# Supplementary material for: Risk Stratification of Gastrointestinal Stromal Tumors by Nanostring Gene Expression Profiling
Source: Research Square preprint supplement (doi:10.21203/rs.3.rs-1015559/v1), 2021-10-27
Supplement: Supplementary file 1 [file 1da4e3ed3989428e4b784bf3.xlsx]

## Sheet: Sheet1
Gene Name	1	2	3	4	5	6	7	8	9	10	11	12	13	14	15	16	17	18	19	20	21	22	23	24	25	26	27	28	29	30	31	32	33	34	35	36	37	38	39	40	41	42	43	44	45	46	47	48	49
ABCB1	535.96	171.33	234.18	233.51	54.53	127.22	184.05	260.92	280.72	141.06	364.85	676.9	882.79	48.47	135.83	387.22	474.18	170.57	723.76	158.48	47.93	430.75	517.27	180.25	654.99	104.36	344.99	291.88	64.44	223.89	211.97	488.21	280.14	39.27	101.01	260.64	78.12	601.9	112.93	216.35	445.42	223.55	302.84	407.72	287.88	113.34	196.68	42.36	73.53
ABL1	88.42	138.38	232.42	177.8	181.4	154.3	209.75	128.1	160.97	68.39	182.43	101.32	72.05	276.26	122.05	195.57	226.11	159.91	116.82	249.04	271.6	81.81	90.69	127.92	152.92	119.43	138.42	107.77	172.96	133.33	98.36	69.74	92.63	215.98	60.02	81.32	186.43	160.59	126.48	167.67	192.53	182.91	113.39	130.68	266.97	131.72	159.15	320.03	214.88
AKT1	1.36	1.32	1.76	3.56	2.23	4.1	3.08	1.77	1	4.27	1	1	1.52	4.85	3.94	1.96	2.2	1.33	1.34	3.48	3.99	1	1	1.16	1	2.15	1.05	2.25	3.39	2.52	2.77	2.58	4.52	2.18	1.46	4.17	1.78	1.31	1.51	1.8	1.63	1.2	1.44	3.92	1.61	3.06	2.59	3.53	1.27
AKT2	325.12	218.77	258.84	314.11	389.51	284.81	301.26	267.42	213.97	259.68	307.19	194.02	277.2	470.12	299.23	422.42	587.24	293.17	337.04	360.5	455.33	187.83	204.53	199.44	300.74	349.67	334.51	354.75	359.49	342.12	292.32	320.31	237.22	379.59	284	210.59	239.7	261.13	338.78	407.45	448.69	209.21	401.88	224.77	295.92	254.24	273.02	329.44	361.31
APC	84.34	108.07	98.6	116.16	101.27	66.48	82.25	96.81	113.86	87.63	82.23	65.39	47.78	106.62	49.21	80.18	83.42	111.94	92.65	128.87	163.76	69.29	60.67	50.59	83.25	117.27	100.67	94.3	61.05	98.11	81.74	64.58	79.07	207.25	106.87	61.51	110.08	67.89	63.24	100.96	135.42	83.68	83.25	88.86	65.94	143.97	73.75	174.13	155.3
AR	277.5	7.91	36.98	26.08	44.52	49.25	8.23	116.29	11.78	187.01	14.18	44.55	134.24	24.23	21.65	29.34	193.18	27.98	143.68	116.68	3.99	17.53	33.78	15.12	41.63	91.45	136.32	40.41	33.91	47.8	202.27	147.24	9.04	43.63	13.18	68.81	21.31	75.73	168.64	57.69	9.79	21.52	60.28	143.75	33.77	9.19	89.28	312.97	29.79
AREG	9.52	15.81	5.28	11.85	10.02	4.92	21.59	1.18	5.89	21.37	3.78	6.47	1.9	24.23	11.81	7.82	3.29	1.33	1.34	12.19	3.99	14.19	5	5.81	11.04	6.46	8.39	2.25	16.96	7.55	48.49	10.33	27.11	4.36	1.46	13.55	30.18	3.92	10.54	3.61	21.21	7.17	33.01	3.92	3.22	9.19	1.29	20	4.44
ATM	4.08	2.64	7.04	3.56	3.34	2.46	4.11	2.95	5.89	5.34	4.73	2.87	1.52	14.54	3.94	5.87	1.1	2.67	4.03	3.48	15.98	1.67	1.88	2.33	1	1.08	1.05	6.74	3.39	7.55	1.39	10.33	9.04	8.73	1.46	3.13	8.88	1.31	4.52	1.8	3.26	1.2	5.74	1.31	1.61	12.25	1.29	2.35	3.17
BCL2	170.04	220.09	639.17	482.43	415.11	213.4	559.33	93.27	159.99	119.69	182.43	221.32	49.3	736.68	311.04	158.41	99.89	1000.76	178.59	36.57	555.18	75.13	287.09	255.84	141.02	96.83	125.83	208.81	474.79	193.7	99.75	64.58	162.66	1075.52	98.08	19.81	523.79	335.55	75.28	245.19	213.74	228.34	81.81	205.17	321.65	1510.14	2.59	502.39	673.17
BCL2A1	12.24	34.27	7.04	9.48	2.23	11.49	5.14	2.36	6.87	10.69	2.84	4.31	9.1	24.23	1.97	5.87	1.1	2.67	1.34	19.16	7.99	133.57	8.13	9.3	17.84	2.15	18.87	2.25	3.39	5.03	8.31	7.75	205.59	6.54	10.25	36.49	10.65	2.61	10.54	3.61	8.16	1.2	1.44	11.76	17.69	3.06	3.88	12.94	3.8
BCL2L1	243.5	275.44	153.19	129.2	188.08	165.8	139.83	94.45	85.39	105.79	86.96	145.87	69.77	426.5	96.46	121.25	120.74	153.25	166.5	268.2	303.55	225.39	137.6	141.88	90.05	174.3	225.45	132.47	189.92	140.87	80.35	113.66	223.66	253.06	83.44	249.17	154.47	197.15	118.95	142.43	101.16	131.5	143.53	116.31	204.25	263.43	91.87	532.98	180.65
BCL3	43.53	108.07	54.58	59.27	27.82	23.8	27.76	10.63	33.37	47.02	32.14	25.87	32.23	72.7	27.56	101.69	37.32	25.32	49.68	85.33	31.95	163.62	76.31	30.24	142.72	43.04	61.87	69.6	57.65	60.37	33.25	33.58	135.55	24	40.99	99.04	39.06	32.64	70.77	52.28	62	21.52	104.78	60.11	83.63	18.38	64.7	95.3	33.6
BCL6	35.37	75.12	26.41	30.82	41.18	26.26	28.79	33.06	55.95	34.2	47.26	12.22	15.17	77.55	17.72	43.02	6.59	14.66	34.91	299.54	39.94	209.53	15.64	46.52	96.85	38.73	53.48	31.43	67.83	27.67	29.09	23.25	160.4	41.45	21.96	41.7	67.47	26.11	96.36	45.07	60.37	17.93	14.35	30.06	32.16	18.38	12.94	80.01	12.04
BCR	28.57	79.07	100.36	71.12	64.55	91.93	73	51.95	42.21	42.75	33.08	66.11	64.47	96.93	92.52	103.65	62.57	63.96	85.94	95.78	167.75	37.57	26.9	34.31	41.63	220.56	73.4	67.36	84.78	40.25	42.95	69.74	38.41	98.17	46.85	42.74	95.88	37.86	28.61	55.89	86.47	63.36	48.8	53.58	54.68	49.01	41.41	112.95	77.33
BIRC2	73.46	98.84	98.6	156.46	120.19	84.54	99.73	158.8	117.78	83.35	111.54	98.45	93.28	150.24	61.03	132.99	143.79	163.91	81.91	217.69	159.76	110.19	66.3	111.06	190.3	176.45	147.85	121.24	125.48	118.23	114.99	147.24	83.59	268.33	96.62	100.08	161.58	155.37	117.44	122.6	135.42	53.8	159.32	113.69	107.75	98.02	111.28	150.6	185.72
BIRC5	19.04	2.64	19.37	16.59	2.23	3.28	12.34	7.67	1.96	24.58	10.4	30.9	61.43	4.85	39.37	5.87	9.88	10.66	4.03	5.22	7.99	4.17	45.03	43.03	50.97	13.99	13.63	2.25	20.35	12.58	59.57	51.66	51.96	6.54	73.2	17.72	3.55	9.14	7.53	5.41	6.53	27.5	12.92	15.68	8.04	3.06	18.11	38.83	10.14
BLM	4.08	5.27	3.52	3.56	3.34	1.64	9.25	4.72	2.94	4.27	4.73	6.47	11	14.54	13.78	1.96	3.29	4	13.43	8.71	15.98	4.17	3.13	5.23	4.25	3.23	12.58	2.25	20.35	12.58	8.31	7.75	15.81	6.54	4.39	8.34	8.88	3.92	3.01	1.8	8.16	3.59	11.48	5.23	3.22	6.13	1.29	3.53	3.17
BMI1	130.59	80.39	211.29	111.42	166.93	165.8	107.96	135.18	57.91	133.58	76.56	63.24	75.84	198.71	45.28	99.74	196.48	206.55	181.28	222.92	163.76	63.44	73.81	73.26	110.44	241	161.49	305.35	132.26	226.4	90.05	82.66	31.63	272.7	221.05	160.55	225.5	152.76	159.6	207.33	84.84	60.97	208.12	74.49	125.44	107.21	147.51	385.91	193.33
BRAF	107.46	129.15	169.04	174.24	202.55	152.66	138.8	115.11	130.54	114.34	65.22	106.35	50.06	227.79	187.02	97.78	107.57	179.9	120.85	177.64	215.68	93.5	83.81	98.85	109.59	107.59	144.71	159.41	240.79	155.97	123.3	108.49	101.67	277.06	101.01	86.53	145.6	127.95	123.47	128.01	150.11	113.57	119.13	113.69	109.36	229.74	113.87	202.37	263.69
BRCA1	6.8	10.54	14.09	20.15	10.02	3.28	18.51	12.4	7.85	17.1	6.62	16.53	21.24	9.69	23.62	9.78	13.17	9.33	8.06	29.61	15.98	13.36	22.52	28.49	37.38	12.91	13.63	6.74	13.57	10.06	16.62	23.25	27.11	6.54	30.74	12.51	21.31	7.83	7.53	9.01	1.63	21.52	12.92	11.76	12.87	12.25	15.53	5.88	15.85
BRCA2	16.32	10.54	15.85	4.74	6.68	6.57	2.06	17.12	15.7	12.82	4.73	16.53	15.17	24.23	19.69	3.91	15.37	9.33	2.69	5.22	7.99	12.52	5.63	14.54	24.64	16.14	14.68	8.98	6.78	2.52	27.71	38.75	11.3	8.73	24.89	13.55	10.65	3.92	16.56	9.01	13.05	14.35	20.09	13.07	20.91	12.25	10.35	11.77	5.07
CASP10	5.44	3.95	7.04	4.74	4.45	4.92	2.06	1	2.94	4.27	4.73	1.44	3.03	4.85	5.91	9.78	3.29	2.67	6.71	5.22	3.99	5.84	1.25	1.74	1.7	4.3	5.24	4.49	3.39	10.06	2.77	5.17	6.78	4.36	7.32	3.13	8.88	5.22	3.01	5.41	8.16	4.78	1.44	1.31	6.43	12.25	2.59	5.88	5.7
CASP2	66.66	48.76	73.95	77.05	51.19	51.71	50.38	31.88	55.95	78.01	22.69	71.86	65.6	82.39	74.81	48.89	50.49	55.97	49.68	64.44	79.88	43.41	83.19	73.26	57.77	37.66	77.6	67.36	64.44	57.86	85.9	43.91	47.44	54.54	89.3	86.53	63.92	33.95	67.76	39.66	48.95	84.88	99.03	39.2	57.9	76.58	69.87	72.95	95.08
CAV1	48.97	566.7	102.13	143.43	162.48	69.77	159.37	72.61	91.28	13.89	91.69	25.87	88.73	222.94	35.43	97.78	50.49	35.98	20.14	386.62	91.86	74.3	53.79	35.47	27.19	7.53	34.6	13.47	217.05	15.09	41.56	15.5	63.26	78.54	14.64	18.77	262.78	39.17	19.57	21.63	177.84	43.04	15.79	74.49	53.07	67.39	3.88	78.83	151.49
CCNA2	35.37	13.18	28.17	11.85	21.14	9.03	19.54	16.53	8.83	43.81	16.07	37.37	51.57	29.08	61.03	5.87	19.76	21.32	8.06	13.93	15.98	14.19	81.31	58.73	57.77	16.14	33.56	11.23	37.31	17.61	37.41	54.25	45.18	21.82	103.94	13.55	15.98	16.97	21.08	12.62	16.32	60.97	25.84	9.15	17.69	12.25	32.35	27.06	25.99
CCND1	180.92	423.05	213.06	154.09	42.29	54.17	259.1	834.13	17.67	14.96	85.07	335.58	444.81	63.01	13.78	54.76	1065.81	153.25	16.11	452.8	147.78	21.7	31.9	29.07	22.09	1155.53	84.94	262.69	61.05	5.03	30.48	95.58	24.85	78.54	7.32	760.02	122.51	275.49	18.07	23.44	112.58	33.47	213.86	41.82	86.85	39.82	323.48	47.06	58.32
CCND2	1044.72	510.03	433.15	350.86	724.49	658.26	758.8	1938.63	319.98	667.9	1758.1	628.04	908.2	436.19	767.75	823.34	1890.14	775.56	982.91	727.96	483.28	85.98	91.94	73.26	143.57	2406.81	281.03	1542.47	423.92	1574.75	845.1	92.99	31.63	543.21	23.42	855.93	687.14	779.46	918.47	1335.94	996.9	52.6	1890.26	659.94	508.21	1402.93	944.56	54.12	855.09
CCND3	250.3	127.84	174.32	253.66	184.74	149.38	254.99	238.49	168.82	137.85	315.7	179.65	258.24	387.73	202.77	305.08	499.43	214.54	259.16	139.32	423.37	164.45	227.05	111.64	344.91	323.85	288.37	208.81	234.01	349.67	123.3	154.99	300.48	253.06	86.37	74.02	150.92	137.09	164.12	308.29	285.53	173.34	73.2	164.66	310.39	330.82	163.03	237.67	132.48
CCNE1	20.4	13.18	33.45	33.19	20.03	12.31	5.14	8.26	2.94	44.88	54.82	32.34	89.49	19.39	64.96	52.8	45	17.32	12.09	8.71	27.96	42.57	56.29	44.19	61.17	26.9	50.33	24.7	16.96	50.31	51.26	20.67	20.33	37.09	103.94	26.06	14.2	7.83	39.15	16.23	47.32	56.19	12.92	26.14	19.3	21.44	6.47	142.36	22.82
CD34	5654.83	193.73	838.14	98.38	60.1	137.89	581.95	7052.64	1652.9	2711.13	594.54	300.37	1601.77	232.64	15.75	1030.64	6049.1	50.64	3324.72	945.65	195.71	105.18	277.71	34.89	49.27	3733.41	140.51	6367.45	105.13	5997.14	2127.98	1175.33	31.63	167.98	358.66	4206.68	314.27	852.58	1848.99	5058.9	463.37	395.7	7464.89	802.38	2196.87	36.76	8825.84	127.07	200.94
CD44	516.92	502.12	880.39	310.56	281.56	471.94	493.53	961.05	535.92	411.42	447.09	482.17	312.84	1042.02	439	512.39	199.77	1293.93	518.31	289.09	487.28	295.52	174.51	422.73	286.29	33.35	695.23	1403.26	691.84	991.14	243.83	51.66	205.59	1003.53	244.48	53.17	1246.44	617.56	147.56	1031.25	505.79	267.79	268.4	250.91	796.08	1157.88	43.99	1105.97	1799.56
CDC2	16.32	23.72	29.93	13.04	15.58	13.13	27.76	17.12	1	48.09	12.29	68.27	40.58	19.39	88.59	13.69	19.76	23.99	8.06	10.45	3.99	10.02	61.92	87.22	67.96	37.66	28.31	4.49	47.48	20.12	45.72	100.74	72.3	21.82	150.78	25.02	35.51	19.58	42.16	1.8	13.05	58.58	41.62	11.76	19.3	12.25	68.58	43.53	48.17
CDC25B	96.58	98.84	125.02	75.86	121.31	63.2	61.69	43.68	44.17	80.15	96.41	68.27	87.22	87.24	100.4	132.99	79.03	98.61	69.82	101.01	167.75	103.51	76.31	58.73	136.78	57.02	91.23	78.58	132.26	113.2	106.68	317.73	74.55	139.62	90.76	184.53	108.31	65.28	140.03	97.36	71.79	100.42	77.51	65.34	85.24	174.6	100.93	131.78	102.05
CDC25C	2.72	1.32	1.76	2.37	2.23	1	1.03	2.36	1	1.07	1	1	8.72	9.69	3.94	1.96	2.2	1.33	1.34	1.74	3.99	1	3.75	4.07	4.25	3.23	3.15	2.25	3.39	10.06	5.54	5.17	6.78	2.18	5.86	1.04	5.33	1.31	3.01	1.8	1.63	1.2	2.87	1.31	6.43	3.06	1.29	2.35	2.54
CDH1	12.24	9.23	24.65	4.74	2.23	1.64	43.18	1.18	2.94	18.17	1	1.44	1	14.54	3.94	1.96	3.29	4	1.34	6.97	175.74	10.85	48.79	1.74	14.44	1.08	3.15	2.25	94.96	2.52	62.34	196.32	40.67	8.73	4.39	19.81	39.06	60.06	3.01	5.41	34.26	21.52	31.58	27.44	17.69	6.13	1.29	5.88	121.07
CDH11	858.36	444.13	628.6	926.94	636.57	1369.04	1584.43	853.02	544.75	431.73	755.23	1172.01	476.66	814.23	236.23	987.61	2318.22	315.82	651.25	785.43	886.69	280.49	1083.95	1169.91	406.93	1046.86	1367.39	648.87	484.97	397.46	469.65	154.99	1543.05	767.92	398.19	450.38	523.79	1676.43	688.1	540.87	445.42	1162	84.68	535.79	659.38	771.92	411.47	1187.15	701.06
CDK2	13.6	17.13	8.8	13.04	24.48	8.21	9.25	8.26	5.89	16.03	8.51	14.37	13.27	14.54	23.62	7.82	14.27	6.66	6.71	26.12	19.97	17.53	23.77	20.93	8.5	9.68	11.53	11.23	16.96	10.06	16.62	10.33	15.81	8.73	16.1	16.68	10.65	2.61	21.08	5.41	9.79	21.52	22.96	13.07	9.65	6.13	10.35	15.3	13.95
CDK4	50.33	85.66	91.56	88.9	114.63	65.66	65.8	57.26	31.41	99.38	57.66	48.86	49.68	155.09	116.15	56.71	76.83	101.28	56.4	74.89	91.86	54.26	68.8	65.71	87.5	69.93	76.55	65.11	74.61	130.81	70.66	49.08	61	130.89	111.26	59.43	83.45	44.39	94.86	63.1	62	75.32	91.86	48.35	67.55	98.02	68.58	210.6	101.42
CDK6	14.96	59.31	100.36	87.72	80.13	41.04	35.99	67.3	31.41	3.21	19.85	18.68	17.82	67.85	35.43	25.42	36.22	61.3	33.57	73.14	119.82	25.88	5	18.03	11.89	17.21	22.02	31.43	78	15.09	9.7	20.67	27.11	102.53	4.39	9.38	62.14	49.61	6.02	46.88	9.79	19.13	8.61	50.97	14.47	91.9	10.35	16.47	146.42
CDKN1A	126.51	291.26	86.28	128.02	131.32	183.85	37.01	85.01	34.35	139.99	74.67	84.07	136.13	227.79	102.37	132.99	163.55	127.93	53.71	369.2	407.4	236.25	213.29	272.13	199.64	31.2	75.5	62.87	132.26	52.83	78.97	62	232.7	263.97	36.6	53.17	117.19	134.48	64.74	137.02	48.95	257.03	43.06	65.34	109.36	349.2	32.35	388.27	81.77
CDKN2A	12.24	34.27	8.8	17.78	6.68	9.85	17.48	4.72	5.89	1.07	4.73	4.31	12.89	14.54	9.84	1.96	8.78	5.33	10.74	15.67	31.95	1	66.3	27.91	1	11.84	34.6	8.98	10.17	27.67	1.39	2.58	9.04	4.36	2.93	1.04	1.78	3.92	3.01	1.8	1.63	98.03	53.11	7.84	9.65	18.38	6.47	16.47	12.68
CDKN2B	25.85	48.76	33.45	36.75	20.03	21.34	73	28.93	30.43	2.14	22.69	22.28	8.72	19.39	17.72	27.38	26.34	39.98	10.74	22.64	99.85	10.02	49.41	28.49	16.14	22.59	17.83	11.23	33.91	27.67	18.01	10.33	13.56	65.45	4.39	10.43	44.39	24.81	1.51	14.42	13.05	52.6	7.18	10.45	20.91	18.38	10.35	41.18	30.43
CDKN2C	29.93	42.17	28.17	32	35.61	44.32	12.34	28.34	36.32	41.68	31.19	28.74	62.57	48.47	43.31	52.8	81.23	41.31	30.88	59.21	7.99	20.87	50.66	49.42	34.83	52.72	26.22	47.15	30.52	57.86	63.73	85.24	81.33	28.36	87.84	61.51	19.53	14.36	36.14	30.65	68.53	31.08	54.54	18.3	19.3	27.57	43.99	58.83	35.5
CEBPA	10.88	65.9	40.5	55.71	116.85	51.71	55.52	14.76	11.78	6.41	24.58	12.22	21.24	33.93	187.02	39.11	55.98	118.6	5.37	127.13	99.85	12.52	20.02	16.86	21.24	4.3	15.73	20.21	118.7	17.61	24.94	25.83	49.7	128.71	4.39	19.81	87	44.39	10.54	21.63	22.84	39.45	24.4	48.35	12.87	52.07	25.88	9.41	84.94
CHEK1	21.77	9.23	26.41	24.89	12.24	3.28	12.34	27.75	15.7	30.99	12.29	41.68	40.58	14.54	31.5	13.69	31.83	26.65	13.43	19.16	27.96	10.02	31.27	53.49	44.18	38.73	17.83	17.96	33.91	30.19	33.25	46.5	24.85	2.18	46.85	23.98	14.2	9.14	12.05	3.61	6.53	35.86	37.32	15.68	9.65	12.25	24.58	40	12.04
CLTC	443.46	453.36	577.54	566.59	563.12	446.5	390.71	333.53	315.07	452.03	359.18	282.4	446.33	697.91	332.69	440.03	439.06	542.36	374.64	391.84	694.97	304.7	284.59	208.75	367	493.84	502.28	541.1	546.01	591.16	475.19	351.31	183	752.64	493.34	311.72	520.24	344.69	457.73	483.17	407.9	320.39	477.95	246.99	350.6	376.77	520.16	807.12	532.45
COL1A1	563.17	1263.87	515.91	4129.72	385.06	172.36	362.95	200.12	83.43	292.81	176.76	180.36	883.55	1105.02	86.62	463.49	1373.15	122.6	234.99	896.89	898.67	697.05	356.52	1639.15	197.09	215.18	456.15	40.41	749.5	178.61	615.12	90.41	1633.42	667.56	83.44	459.76	601.92	172.34	349.32	171.27	153.37	243.88	166.49	107.16	318.43	389.02	234.2	280.02	198.4
CSF1R	4.08	19.77	7.04	16.59	3.34	12.31	5.14	3.54	13.74	5.34	4.73	3.59	14.03	29.08	7.87	13.69	10.98	17.32	13.43	8.71	7.99	5.01	1.88	5.81	5.95	8.61	5.24	4.49	6.78	2.52	1.39	2.58	9.04	10.91	8.78	1.04	8.88	9.14	15.06	1.8	17.95	1.2	5.74	5.23	8.04	12.25	3.88	15.3	3.8
CSF3	2.72	6.59	1.76	1.19	2.23	1.64	3.08	1	1	5.34	3.78	1.44	1	4.85	1.97	3.91	1.1	1.33	1.34	3.48	3.99	5.01	1	1	4.25	1.08	1.05	2.25	3.39	2.52	1.39	2.58	4.52	2.18	1.46	1.04	1.78	2.61	1.51	1.8	1.63	1.2	1.44	1.31	1.61	3.06	1.29	7.06	1.9
CSF3R	12.24	56.67	15.85	13.04	6.68	16.42	16.45	4.13	18.65	8.55	1.89	8.62	14.79	9.69	1.97	1.96	5.49	5.33	2.69	40.06	35.95	121.88	4.38	10.47	18.69	2.15	16.78	4.49	10.17	10.06	8.31	5.17	151.37	24	1.46	12.51	28.41	6.53	21.08	12.62	16.32	14.35	2.87	6.53	14.47	9.19	9.06	30.59	5.07
CSK	133.31	106.75	103.89	60.45	55.64	64.02	124.41	73.79	71.65	40.61	73.73	34.49	70.91	130.86	49.21	80.18	54.88	67.96	87.28	104.49	67.9	51.76	38.78	43.03	45.03	159.23	59.77	67.36	67.83	105.65	49.87	41.33	45.18	78.54	86.37	135.53	101.21	61.36	129.49	164.06	68.53	38.26	109.08	96.7	65.94	52.07	67.28	76.48	77.33
CTGF	429.86	836.87	228.9	542.89	152.47	101.78	386.6	254.43	823.51	243.65	163.52	334.14	165.71	1071.1	25.59	402.87	165.74	98.61	225.59	37657.1	563.17	265.46	169.5	571	45.03	11324	103.81	166.15	929.24	183.64	986.41	20.67	487.99	613.02	48.31	648.47	818.53	180.18	320.71	86.54	117.47	994.64	206.68	47.05	355.42	490.11	643.08	87.07	267.49
CTNNB1	1224.28	931.76	1302.98	900.86	1543.58	1121.99	1467.22	1450.43	1354.52	1557	1240.12	1071.41	1560.43	1415.2	624.05	1435.46	2100.89	1320.58	1035.28	1508.17	1262.13	475.83	855.02	668.1	1273.46	1541.78	1141.94	1497.56	1234.47	1589.85	1288.43	715.53	643.88	1723.45	1507.84	727.7	1507.45	1021	1496.66	1453.13	1375.43	998.22	1161.14	739.65	1180.45	811.74	1749.38	1503.65	1582.77
CXCL9	19.04	6.59	61.63	35.56	25.6	20.52	9.25	20.07	17.67	4.27	17.01	16.53	182.02	48.47	3.94	7.82	8.78	27.98	8.06	40.06	19.97	1	40.03	53.49	73.91	18.29	13.63	6.74	54.26	7.55	8.31	5.17	9.04	17.45	190.31	6.26	79.9	14.36	7.53	10.82	8.16	9.56	5.74	18.3	57.9	101.08	6.47	15.3	9.51
CYP1A1	1.36	1.32	1.76	1.19	1.11	1	1.03	1	1	1.07	1	1	1	4.85	3.94	1.96	1.1	1.33	1.34	1.74	3.99	1.67	1	1	1	1.08	1.05	2.25	3.39	2.52	1.39	5.17	2.26	2.18	1.46	1.04	1.78	3.92	1.51	1.8	3.26	1.2	1.44	1.31	1.61	3.06	1.29	1.18	1.9
DAP3	163.24	109.39	146.15	190.84	190.3	242.13	230.31	107.44	118.77	149.61	95.47	106.35	124	218.1	177.17	105.61	128.42	171.9	124.88	104.49	323.52	151.93	138.86	106.99	208.99	214.11	167.78	130.22	220.44	173.57	119.14	147.24	51.96	390.5	162.5	136.57	234.37	160.59	153.58	117.19	102.79	157.8	282.75	95.4	128.66	162.35	156.56	402.38	223.12
DAPK1	5.44	32.95	21.13	20.15	6.68	4.92	17.48	24.79	17.67	6.41	29.3	12.22	12.51	9.69	17.72	19.56	9.88	14.66	5.37	53.99	19.97	7.51	8.76	6.98	21.24	6.46	14.68	15.72	23.74	7.55	6.93	18.08	18.07	17.45	11.71	4.17	28.41	26.11	9.03	30.65	55.47	25.11	24.4	13.07	9.65	39.82	19.41	14.12	6.34
DEK	439.38	197.69	459.57	334.27	402.87	359.5	306.4	379.58	307.22	333.41	228.74	390.91	157.37	436.19	440.97	191.66	249.16	338.47	349.12	315.22	339.5	240.42	457.22	492.5	488.48	332.46	387.99	386.18	342.53	596.19	401.77	369.39	228.18	486.49	414.29	203.3	394.17	351.21	341.79	248.8	208.84	468.63	343.03	213.01	305.57	260.37	345.48	1049.49	367.64
DLC1	4.08	46.13	169.04	237.07	211.45	156.77	201.52	135.78	166.86	151.75	49.15	51.02	127.03	130.86	92.52	95.83	82.32	227.87	91.31	78.37	147.78	104.35	94.45	62.8	96	119.43	99.62	127.98	98.35	130.81	126.07	95.58	40.67	174.53	207.88	102.17	181.11	116.2	144.55	118.99	132.16	82.49	124.87	78.41	36.99	223.61	103.51	51.77	374.62
E2F1	29.93	6.59	7.04	10.67	3.34	9.03	9.25	15.94	5.89	22.44	14.18	19.4	76.6	24.23	25.59	21.51	24.15	23.99	18.8	10.45	19.97	10.02	48.79	65.12	18.69	16.14	23.07	17.96	6.78	20.12	31.86	28.41	42.93	15.27	45.38	15.64	21.31	15.67	21.08	27.04	14.68	38.26	30.14	16.99	17.69	18.38	25.88	18.83	10.14
E2F3	48.97	35.58	15.85	27.26	16.69	37.76	70.94	30.7	19.63	45.95	37.81	21.56	14.41	53.31	33.47	44.98	35.12	41.31	20.14	27.86	107.84	20.04	29.4	31.4	28.03	47.34	24.12	62.87	64.44	52.83	20.78	31	27.11	54.54	19.03	32.32	12.43	24.81	40.65	9.01	34.26	39.45	51.67	31.36	22.52	49.01	34.94	147.07	41.2
EGF	14.96	3.95	5.28	2.37	2.23	3.28	4.11	7.08	1.96	2.14	2.84	1.44	1.9	9.69	1.97	9.78	3.29	5.33	4.03	3.48	11.98	3.34	5.63	6.98	5.1	2.15	9.44	2.25	3.39	5.03	2.77	10.33	2.26	6.54	7.32	3.13	7.1	3.92	10.54	1.8	6.53	5.98	11.48	3.92	1.61	6.13	2.59	1.18	1.9
EGFR	125.15	147.61	88.04	155.28	231.48	88.64	111.04	53.13	82.45	70.53	81.29	58.92	49.3	368.34	21.65	82.14	174.52	102.61	77.88	107.97	251.63	57.6	40.66	49.42	92.6	108.67	70.26	76.34	227.22	55.34	51.26	129.16	33.89	226.88	17.57	59.43	191.76	104.45	75.28	70.31	106.05	156.61	35.88	111.08	80.41	324.7	64.7	124.72	348.63
EGR1	127.87	119.93	28.17	42.67	48.97	59.1	129.55	84.42	95.21	43.81	12.29	79.76	179.74	63.01	7.87	144.72	72.44	33.31	42.97	1980.12	183.73	102.68	46.29	43.61	61.17	277.59	40.9	22.45	101.74	25.16	101.13	31	225.92	58.9	36.6	193.91	106.53	156.68	57.22	59.5	73.42	66.95	111.95	54.89	57.9	12.25	120.33	65.89	32.33
EPS8	108.83	199	149.67	258.4	87.92	36.93	132.64	90.91	293.48	80.15	333.66	114.25	277.2	159.94	163.39	459.58	248.07	86.62	64.45	336.12	123.82	166.12	95.7	116.87	180.1	33.35	34.6	87.56	172.96	55.34	74.81	105.91	103.92	194.16	153.71	132.4	248.58	238.93	96.36	306.49	220.26	102.81	55.98	107.16	197.81	214.42	76.34	124.72	112.83
ERBB2	13.6	14.5	51.06	26.08	109.06	55.81	37.01	8.85	15.7	19.24	5.67	38.8	3.79	77.55	92.52	1.96	140.5	113.27	5.37	74.89	123.82	10.85	18.14	35.47	13.59	7.53	8.39	2.25	128.87	2.52	51.26	72.33	18.07	13.09	8.78	72.98	51.49	32.64	6.02	7.21	13.05	21.52	12.92	10.45	33.77	6.13	46.58	88.24	74.16
ERBB3	19.04	3.95	8.8	1.19	1.11	1.64	21.59	1	19.63	7.48	1	2.87	1	4.85	3.94	3.91	1.1	1.33	2.69	8.71	83.88	1.67	15.64	4.07	7.65	3.23	1.05	2.25	67.83	7.55	30.48	87.83	29.37	2.18	1.46	18.77	15.98	23.5	1.51	1.8	19.58	8.37	8.61	11.76	9.65	9.19	3.88	4.71	58.95
ERBB4	5.44	1.32	12.33	14.22	3.34	21.34	6.17	4.13	23.56	5.34	1	1	4.55	4.85	1.97	9.78	1.1	2.67	6.71	3.48	15.98	1.67	5.63	4.07	3.4	3.23	28.31	22.45	13.57	10.06	13.85	5.17	6.78	2.18	2.93	10.43	1.78	1.31	7.53	97.36	3.26	2.39	4.31	1.31	11.26	6.13	1.29	14.12	12.68
ERCC2	14.96	40.86	56.35	48.6	62.32	60.74	44.21	23.61	35.34	43.81	23.63	30.9	14.03	87.24	84.65	29.34	26.34	29.32	36.26	38.31	67.9	26.71	18.76	21.51	45.88	64.55	34.6	29.19	37.31	35.22	30.48	23.25	31.63	80.72	39.53	28.15	35.51	32.64	51.19	27.04	34.26	13.15	45.93	30.06	20.91	58.2	33.64	37.65	54.51
ERCC4	47.61	35.58	42.26	41.49	47.85	42.68	55.52	28.93	28.46	27.78	30.25	30.9	17.06	48.47	45.28	31.29	37.32	59.97	25.51	48.76	115.83	27.55	27.52	27.91	28.03	46.26	35.65	29.19	50.87	32.7	34.64	31	27.11	54.54	35.13	22.94	47.94	33.95	21.08	39.66	31	34.67	31.58	31.36	36.99	42.88	45.29	49.42	81.77
ESR1	4.08	6.59	3.52	9.48	1.11	1	4.11	1	3.93	1.07	2.84	1.44	2.28	24.23	3.94	7.82	6.59	1.33	8.06	13.93	3.99	2.5	1.25	1.74	2.55	5.38	2.1	2.25	13.57	2.52	4.16	7.75	2.26	4.36	1.46	1.04	3.55	1.31	3.01	3.61	4.89	1.2	2.87	6.53	3.22	3.06	1.29	5.88	6.34
ETS1	107.46	154.19	144.38	131.57	73.45	128.86	69.92	147.58	144.29	475.54	129.49	86.23	129.69	455.58	13.78	123.21	98.79	94.61	140.99	202.02	195.71	146.09	59.42	98.85	99.4	682.13	96.47	206.56	274.7	296.84	545.85	222.15	153.63	325.06	319.14	150.13	218.39	90.09	567.65	124.4	164.79	58.58	113.39	104.54	110.97	315.51	201.85	132.95	166.07
ETS2	191.8	334.75	285.25	234.7	296.03	169.9	292	402.01	231.64	330.21	175.81	221.32	141.82	295.64	98.43	264.02	172.33	142.59	153.08	651.33	439.35	538.44	288.97	138.97	561.54	638.02	364.92	98.79	284.88	261.62	156.55	173.07	345.66	237.79	193.24	411.81	404.83	117.51	337.28	144.23	194.16	296.48	368.87	205.17	234.8	214.42	194.09	170.6	226.29
ETV1	404.01	570.65	1257.2	1064.43	1533.57	757.57	937.7	409.1	519.23	1313.35	408.33	1173.45	317.77	1759.31	805.16	355.93	522.48	1411.19	867.44	123.65	1118.34	395.69	647.99	544.83	863.98	541.18	912.29	1259.57	776.63	1129.49	929.61	578.62	325.33	2065.95	1112.58	677.66	910.86	816.02	891.37	932.09	791.32	719.68	1053.5	358.07	907.05	2092.15	769.88	3026.12	1949.78
ETV6	156.44	152.88	153.19	133.94	145.79	201.09	152.17	167.06	121.71	119.69	113.43	107.79	84.56	334.41	45.28	148.63	185.5	117.27	89.97	181.12	195.71	75.13	104.45	134.9	81.56	188.28	143.66	132.47	183.14	150.93	152.39	82.66	92.63	231.25	130.29	169.94	193.54	139.7	170.14	68.51	128.9	64.56	67.46	71.87	93.28	364.52	196.68	187.07	125.51
FANCG	9.52	21.09	31.69	18.97	23.37	18.88	12.34	7.08	8.83	23.51	11.34	11.5	14.79	19.39	25.59	11.73	20.86	15.99	16.11	17.42	27.96	5.84	28.15	20.35	20.39	20.44	15.73	13.47	40.7	12.58	12.47	20.67	49.7	17.45	13.18	20.85	23.08	11.75	10.54	9.01	1.63	34.67	35.88	14.37	25.73	24.51	14.23	18.83	24.72
FAS	20.4	19.77	21.13	16.59	15.58	31.19	16.45	12.4	15.7	17.1	31.19	16.53	12.13	43.62	19.69	19.56	8.78	26.65	20.14	31.35	23.96	28.38	23.77	41.28	23.79	17.21	94.37	11.23	30.52	30.19	18.01	31	27.11	41.45	11.71	15.64	24.86	15.67	27.1	18.03	24.47	26.3	35.88	24.83	12.87	30.63	1.29	97.65	19.65
FAT1	206.77	147.61	186.64	152.91	186.97	295.48	417.44	124.56	301.33	383.64	52.93	394.5	383.38	101.78	259.85	60.63	749.69	273.18	67.14	672.23	451.33	80.97	385.92	283.17	281.2	509.98	117.44	101.03	295.05	103.14	303.4	351.31	214.63	202.89	194.7	226.23	287.64	267.65	353.84	52.28	184.37	502.1	321.5	111.08	152.78	263.43	146.21	411.8	322.64
FGF1	16.32	14.5	14.09	17.78	60.1	18.06	45.24	40.14	142.32	14.96	58.6	23.71	10.62	9.69	141.74	68.45	38.42	21.32	33.57	50.5	43.93	17.53	17.51	12.21	13.59	10.76	16.78	22.45	30.52	12.58	2.77	5.17	13.56	15.27	14.64	36.49	40.84	30.03	16.56	86.54	29.37	101.62	2.87	30.06	8.04	42.88	27.17	5.88	24.09
FGF2	247.58	296.53	200.73	253.66	202.55	156.77	243.68	380.17	248.33	216.93	220.23	198.33	376.93	319.87	188.99	310.95	330.39	238.53	319.58	367.46	283.58	85.15	229.55	198.86	130.83	390.56	166.73	568.04	335.75	412.55	357.43	129.16	79.07	416.68	215.2	463.93	287.64	240.24	338.78	647.24	401.37	233.12	421.97	228.69	238.02	232.8	737.54	477.68	297.92
FGFR1	802.59	541.66	420.83	459.91	838.01	706.68	1115.58	662.35	879.45	587.75	763.73	1376.09	511.93	353.8	568.92	987.61	495.04	526.37	710.33	586.9	643.05	308.04	995.76	354.11	653.29	672.44	1209.05	660.1	674.89	759.7	619.28	557.96	228.18	558.48	648.52	299.21	605.47	822.55	773.93	879.81	900.64	490.15	746.35	788	424.58	725.97	612.03	683.58	715
FGFR2	13.6	23.72	40.5	241.81	260.42	62.38	83.28	39.55	101.1	27.78	69.95	40.24	174.43	82.39	161.42	25.42	7.68	43.97	22.83	29.61	187.72	59.27	362.15	80.82	74.76	22.59	72.35	35.92	152.61	88.05	48.49	49.08	11.3	545.39	250.33	72.98	454.54	26.11	28.61	30.65	53.84	93.25	4.31	50.97	183.34	364.52	58.23	142.36	115.36
FGFR3	2.72	6.59	8.8	3.56	3.34	1	21.59	2.36	7.85	3.21	6.62	10.78	62.19	4.85	7.87	17.6	12.07	2.67	8.06	10.45	51.92	8.35	6.25	2.33	7.65	6.46	2.1	8.98	6.78	5.03	13.85	54.25	13.56	2.18	2.93	13.55	19.53	14.36	4.52	5.41	11.42	3.59	18.66	9.15	14.47	15.32	5.18	3.53	29.16
FGFR4	73.46	1.32	5.28	2.37	1.11	3.28	2.06	21.25	98.15	20.3	21.74	25.15	27.3	9.69	1.97	27.38	7.68	4	37.6	6.97	19.97	40.9	25.64	1.74	44.18	4.3	42.99	13.47	10.17	37.73	40.18	18.08	22.59	2.18	32.21	2.09	3.55	33.95	21.08	37.86	53.84	3.59	4.31	7.84	151.18	3.06	2.59	42.36	7.61
FGR	17.68	67.21	15.85	11.85	18.92	18.88	14.39	5.31	21.59	5.34	9.45	7.9	10.62	101.78	5.91	13.69	13.17	8	2.69	43.54	11.98	91.83	12.51	20.93	12.74	7.53	29.36	22.45	44.09	5.03	12.47	10.33	144.59	24	10.25	15.64	35.51	20.89	22.59	18.03	13.05	5.98	11.48	10.45	16.08	15.32	5.18	35.3	8.24
FLT1	27.21	35.58	10.56	21.34	32.27	91.11	19.54	7.67	24.54	10.69	10.4	8.62	11.76	169.63	11.81	23.47	7.68	18.66	12.09	24.38	71.89	34.23	8.76	7.56	16.14	9.68	11.53	13.47	64.44	15.09	5.54	18.08	22.59	39.27	2.93	10.43	35.51	11.75	18.07	14.42	17.95	13.15	25.84	39.2	11.26	30.63	6.47	137.66	72.26
FLT3	1.36	2.64	3.52	1.19	1.11	10.67	2.06	1.18	1	3.21	1	1	1	9.69	1.97	5.87	1.1	2.67	5.37	3.48	7.99	1	3.13	5.81	1.7	1.08	4.19	2.25	3.39	2.52	1.39	2.58	2.26	8.73	2.93	1.04	12.43	1.31	1.51	1.8	3.26	1.2	1.44	1.31	1.61	6.13	2.59	2.35	1.27
FOLR1	6.8	11.86	21.13	1.19	13.35	11.49	9.25	15.35	13.74	42.75	12.29	22.28	3.41	14.54	57.09	21.51	36.22	14.66	16.11	8.71	27.96	5.84	18.14	9.88	5.1	18.29	6.29	15.72	16.96	22.64	13.85	64.58	15.81	15.27	11.71	35.45	10.65	9.14	46.68	19.83	11.42	4.78	18.66	9.15	3.22	9.19	20.7	5.88	8.87
FOS	489.71	739.34	179.6	783.51	146.9	70.59	540.83	155.85	798.97	190.22	106.81	199.77	965.46	237.48	161.42	502.61	111.96	118.6	103.39	7377.12	850.74	456.63	250.19	682.64	233.62	265.75	57.67	83.07	423.92	196.22	335.27	38.75	643.88	538.85	74.66	901.8	1599.78	263.74	48.18	187.5	310	387.33	594.21	120.23	98.1	183.79	112.57	330.61	202.2
FOSL2	89.78	196.37	36.98	66.38	54.53	38.58	34.96	18.3	81.47	88.7	36.86	27.31	94.04	155.09	13.78	140.81	21.95	15.99	48.34	508.53	99.85	272.14	56.92	84.89	110.44	63.48	44.04	60.62	111.92	30.19	126.07	147.24	232.7	41.45	20.49	160.55	166.9	32.64	66.25	43.27	84.84	38.26	71.76	47.05	53.07	49.01	33.64	130.6	38.67
FRZB	21.77	23.72	123.26	139.87	27.82	13.95	74.03	46.64	57.91	23.51	39.7	20.12	23.51	184.17	1.97	54.76	8.78	50.64	8.06	452.8	63.91	10.02	36.9	75.59	11.04	35.51	10.49	26.94	91.57	17.61	30.48	15.5	38.41	89.44	4.39	10.43	269.89	32.64	10.54	34.25	37.53	14.35	21.53	16.99	32.16	36.76	5.18	16.47	56.41
FYN	141.47	139.7	135.58	66.38	140.22	55.81	55.52	81.47	197.29	182.74	67.11	132.22	63.71	198.71	45.28	111.47	159.16	122.6	103.39	135.84	175.74	192.84	191.4	61.64	227.68	37.66	189.8	159.41	122.09	62.89	130.23	41.33	47.44	139.62	71.73	80.28	102.98	189.32	171.65	158.65	135.42	92.05	48.8	128.07	234.8	147.03	94.46	285.9	151.49
GADD45A	34.01	39.54	40.5	37.93	12.24	22.16	31.87	40.14	33.37	32.06	30.25	12.22	47.02	58.16	15.75	54.76	16.46	10.66	17.46	247.3	51.92	50.09	18.76	36.63	23.79	31.2	20.97	42.66	44.09	32.7	31.86	49.08	40.67	34.91	24.89	23.98	47.94	20.89	33.13	32.45	29.37	17.93	25.84	31.36	17.69	42.88	16.82	45.89	24.72
GAPDH	2811.77	6022.82	5226.02	3910.43	9890.27	5986.7	4822.19	5534.91	3944.78	4008.45	3651.36	2624.98	2453.46	7342.58	3204.88	3250.32	2740.81	5438.22	2333.75	3538.79	6865.83	4762.49	2471.87	3190.5	1863.88	5307.47	4270.99	4373.69	4720.82	4648.79	3699.04	1211.49	3940.09	10945	5953.79	4535.09	6626.4	3314.99	5762.29	5412.27	3331.71	4309.69	4680.45	2562.65	4056	7630.36	4081.03	6166.37	8083.74
GAS1	10.88	22.4	28.17	30.82	21.14	14.77	13.37	15.35	24.54	4.27	9.45	7.9	4.17	19.39	7.87	9.78	57.08	6.66	34.91	59.21	15.98	13.36	9.38	42.45	21.24	6.46	85.99	60.62	6.78	20.12	12.47	7.75	18.07	10.91	5.86	11.47	33.74	5.22	3.01	37.86	8.16	11.95	15.79	13.07	12.87	3.06	19.41	267.08	10.14
GATA1	1.36	1.32	1.76	1.19	1.11	1	1.03	1	1	1.07	1	1	1	4.85	1.97	1.96	1.1	1.33	1.34	1.74	3.99	1	1	1	1	3.23	1.05	2.25	3.39	2.52	1.39	2.58	2.26	2.18	1.46	1.04	1.78	2.61	1.51	1.8	1.63	1.2	1.44	1.31	1.61	3.06	1.29	1.18	1
GNAS	4.08	239.86	218.34	13.04	8.9	181.39	4.11	2.36	1	4.27	1068.09	5.03	371.62	116.32	47.25	1030.64	47.2	1.33	12.09	5.22	7.99	5.84	2.5	4.07	5.1	5.38	3.15	2.25	10.17	17.61	12.47	15.5	6.78	6.54	29.28	275.23	1.78	1.31	30.11	138.82	603.69	13.15	45.93	190.79	1.61	3.06	3.88	3.53	1.9
GRB7	4.08	1.32	5.28	1.19	3.34	1	2.06	1.18	2.94	2.14	1.89	1	1	4.85	3.94	1.96	1.1	1.33	1.34	1.74	11.98	2.5	1.88	1	3.4	2.15	4.19	2.25	3.39	2.52	2.77	7.75	11.3	4.36	1.46	6.26	1.78	2.61	1.51	1.8	3.26	5.98	1.44	1.31	4.82	3.06	3.88	2.35	4.44
GUSB	59.85	75.12	29.93	49.78	45.63	57.45	58.61	28.93	58.89	51.29	34.03	30.9	33.37	58.16	41.34	56.71	31.83	35.98	37.6	57.47	87.87	40.07	43.16	59.31	41.63	66.71	39.85	49.39	78	45.28	38.79	74.91	83.59	45.81	51.24	60.47	60.37	26.11	45.17	41.47	39.16	40.65	45.93	40.51	41.81	58.2	50.46	65.89	58.95
HCK	16.32	77.76	33.45	55.71	26.71	36.11	24.68	12.4	33.37	12.82	13.23	17.96	37.54	63.01	3.94	44.98	26.34	19.99	10.74	69.66	39.94	48.42	18.76	27.33	31.43	22.59	69.21	20.21	27.13	22.64	11.08	23.25	65.52	50.18	23.42	19.81	63.92	44.39	27.1	10.82	34.26	19.13	11.48	22.22	64.33	6.13	10.35	35.3	20.92
HDAC1	220.37	209.55	368	284.48	359.46	251.98	329.02	369.54	319	382.57	457.48	202.64	233.59	445.89	131.9	387.22	552.11	303.83	392.09	367.46	391.42	143.58	173.88	150.02	237.87	546.56	252.71	478.23	312.01	402.49	455.8	454.63	203.33	434.13	390.87	221.02	312.5	219.35	442.67	414.66	448.69	175.74	210.99	168.58	197.81	395.15	574.5	343.56	329.61
HIF1A	229.89	340.02	301.09	379.31	343.88	668.93	373.23	174.15	285.63	357.99	145.56	343.48	179.74	387.73	338.6	158.41	103.18	246.53	220.22	196.79	686.98	323.06	192.65	272.71	206.44	353.97	305.15	206.56	200.09	171.06	232.75	214.4	347.92	416.68	289.86	182.45	433.24	470.03	391.48	216.35	200.69	193.67	170.8	196.02	355.42	263.43	265.25	1176.56	640.84
HMMR	1.36	2.64	8.8	1.19	5.56	2.46	3.08	2.95	4.91	4.27	1.89	4.31	6.07	4.85	3.94	1.96	3.29	1.33	1.34	1.74	3.99	2.5	3.75	4.65	5.1	3.23	5.24	2.25	10.17	5.03	9.7	10.33	4.52	2.18	2.93	3.13	3.55	3.92	1.51	1.8	4.89	4.78	2.87	3.92	4.82	3.06	5.18	4.71	3.8
HPRT1	103.38	146.29	198.97	144.61	215.9	210.94	131.61	162.34	118.77	165.64	139.89	145.15	121.73	213.25	259.85	105.61	113.06	103.94	138.31	125.39	171.75	115.2	110.71	135.48	149.52	167.84	124.78	107.77	220.44	155.97	173.18	154.99	92.63	255.24	172.74	157.42	182.88	185.4	161.11	142.43	133.79	137.48	124.87	201.25	170.47	214.42	128.1	250.61	181.92
HRAS	27.21	18.45	17.61	35.56	20.03	16.42	13.37	37.78	33.37	21.37	20.79	38.08	29.2	29.08	21.65	31.29	35.12	46.64	18.8	47.02	39.94	21.7	28.77	15.7	33.98	35.51	20.97	31.43	3.39	27.67	26.32	15.5	31.63	45.81	19.03	22.94	37.29	24.81	18.07	50.48	19.58	23.91	17.22	28.75	14.47	36.76	36.23	36.47	37.4
HSP90AB1	2097.61	2055.93	2725.7	2081.46	4293.54	2713.47	2330.89	2639.35	1469.36	3542.52	1968.88	1544.95	1006.03	3348.99	2391.84	1758.15	2602.51	2451.93	1752.33	1974.9	4165.83	1685.45	1248.45	1084.43	3183.22	1819.37	1626.39	2869.39	2794.51	2113.09	2237.43	1846.94	1407.5	4138.45	1671.8	1078	2086.29	1562.84	2582.26	2304.09	1956.28	1627.04	2478.73	1745.89	1954.02	2432.16	1688.57	4963.92	2800.44
IFNGR1	126.51	172.65	190.17	132.76	238.16	262.65	186.1	171.19	310.16	152.81	143.67	175.33	75.84	295.64	78.74	142.76	102.08	139.92	128.91	437.12	163.76	209.53	135.1	134.32	208.14	383.02	214.96	116.75	223.83	75.47	98.36	149.82	171.7	239.97	70.27	96.96	285.87	228.49	177.67	164.06	187.63	127.92	137.79	120.23	160.82	183.79	177.27	290.61	212.98
IGF1	27.21	9.23	26.41	71.12	13.35	7.39	17.48	17.71	19.63	6.41	111.54	14.37	13.65	19.39	13.78	70.4	18.66	29.32	29.54	34.83	39.94	9.18	8.13	29.07	8.5	8.61	27.26	13.47	20.35	15.09	13.85	7.75	15.81	26.18	11.71	10.43	31.96	20.89	7.53	5.41	45.68	15.54	10.05	26.14	19.3	27.57	6.47	98.83	19.65
IGFBP2	199.97	76.44	151.43	393.53	117.97	682.88	50.38	5.31	271.88	152.81	372.41	8.62	32.23	193.86	43.31	1730.77	499.43	38.64	390.75	654.82	846.75	81.81	14.39	37.8	20.39	22.59	13.63	4.49	172.96	93.08	191.19	183.4	54.22	89.44	14.64	683.91	97.66	9.14	451.71	108.17	122.37	32.28	30.14	67.95	263.75	39.82	49.17	835.36	43.74
IGFBP3	172.76	473.13	207.77	302.26	416.22	455.53	127.49	14.76	101.1	109	240.08	141.56	176.71	1376.43	114.18	177.97	28.54	47.97	89.97	451.06	363.46	243.76	39.4	162.23	40.78	61.33	278.93	154.92	342.53	95.59	135.77	100.74	108.44	626.11	38.06	308.59	419.03	79.64	236.39	173.08	248	123.13	175.1	163.35	151.18	165.41	150.09	2004.86	536.25
IGFBP6	38.09	46.13	73.95	123.28	13.35	10.67	46.27	46.05	62.82	18.17	19.85	16.53	77.74	237.48	1.97	48.89	37.32	19.99	26.86	1260.87	67.9	14.19	13.13	25	11.04	121.58	14.68	22.45	64.44	25.16	41.56	10.33	22.59	39.27	7.32	1005.02	142.04	37.86	36.14	34.25	39.16	11.95	261.22	20.91	43.42	30.63	332.54	4.71	57.68
IL1A	5.44	1.32	1.76	1.19	1.11	1.64	1.03	2.95	2.94	2.14	1	1	1.9	14.54	3.94	5.87	2.2	1.33	8.06	1.74	3.99	1.67	3.13	1.74	1.7	2.15	1.05	2.25	3.39	5.03	2.77	2.58	13.56	2.18	1.46	1.04	1.78	1.31	1.51	3.61	1.63	2.39	1.44	3.92	1.61	3.06	2.59	1.18	3.17
IL1B	29.93	18.45	7.04	7.11	6.68	3.28	10.28	1.77	4.91	11.75	1.89	5.75	9.1	14.54	3.94	7.82	4.39	5.33	1.34	13.93	11.98	24.21	4.38	6.4	36.53	5.38	7.34	2.25	3.39	5.03	40.18	18.08	106.18	4.36	11.71	41.7	10.65	2.61	6.02	1.8	4.89	1.2	2.87	6.53	8.04	3.06	6.47	10.59	3.8
IL4	2.72	1.32	1.76	1.19	5.56	1	1.03	1	1	1.07	1	1	1	4.85	1.97	1.96	1.1	1.33	1.34	1.74	3.99	1	1	1	1.7	1.08	1.05	2.25	3.39	2.52	1.39	2.58	2.26	2.18	1.46	1.04	1.78	1.31	1.51	1.8	1.63	1.2	1.44	1.31	1.61	3.06	1.29	1.18	1
IL6	4.08	6.59	3.52	5.93	4.45	1.64	2.06	4.72	11.78	36.33	4.73	15.09	4.17	4.85	3.94	3.91	3.29	2.67	1.34	10.45	15.98	18.37	3.75	11.63	16.14	22.59	37.75	2.25	3.39	2.52	8.31	5.17	18.07	4.36	4.39	30.23	8.88	1.31	18.07	3.61	3.26	4.78	5.74	2.61	3.22	3.06	2.59	10.59	3.17
IL8	352.32	324.2	5.28	7.11	144.68	2.46	16.45	2.36	10.8	161.36	1.89	10.78	5.31	53.31	7.87	17.6	4.39	2.67	2.69	15.67	3.99	3663.91	10.01	19.77	166.51	13.99	72.35	15.72	16.96	27.67	422.55	18.08	6845.45	4.36	32.21	1016.48	30.18	6.53	162.61	14.42	16.32	5.98	7.18	6.53	11.26	3.06	5.18	27.06	1.27
IRF1	54.41	112.02	163.75	65.19	77.9	32.83	47.3	18.3	13.74	18.17	39.7	125.03	58.4	140.55	7.87	60.63	10.98	66.63	21.48	74.89	119.82	101.84	91.94	50.01	121.48	36.58	136.32	67.36	115.31	5.03	18.01	7.75	90.37	50.18	49.77	26.06	39.06	126.65	21.08	18.03	60.37	47.82	86.12	43.12	147.96	36.76	32.35	170.6	64.02
ITGB1	393.13	727.48	1406.87	834.48	1378.87	1144.97	1690.34	1053.73	1247.53	1195.8	1011.38	443.37	362.14	2025.87	655.54	1144.07	794.69	1463.16	723.76	2378.93	1525.74	589.36	652.37	778	781.57	1024.27	1123.06	817.26	1482.04	739.58	609.58	679.37	634.84	1620.91	948.62	1074.87	1688.56	1218.15	1010.32	1040.27	899.01	884.65	556.89	704.37	1075.92	759.67	1321.09	1714.25	1741.87
JUN	44.89	54.03	36.98	88.9	52.31	48.43	61.69	26.56	128.58	75.87	22.69	27.31	97.46	96.93	45.28	93.87	21.95	39.98	30.88	1666.64	67.9	107.69	17.51	83.15	30.58	41.96	23.07	20.21	88.18	17.61	73.43	46.5	79.07	47.99	16.1	41.7	131.39	40.47	42.16	37.86	40.79	51.41	139.22	23.52	35.38	30.63	25.88	37.65	36.76
JUNB	134.67	312.34	93.32	78.23	102.39	70.59	96.65	65.53	107.97	142.13	64.27	136.53	199.46	184.17	17.72	264.02	99.89	47.97	61.77	1250.42	291.57	295.52	86.32	111.06	107.04	112.97	94.37	56.13	98.35	72.95	114.99	72.33	567.07	124.35	70.27	385.74	229.05	112.28	120.46	84.74	104.42	66.95	180.85	120.23	156	52.07	141.04	250.61	65.29
KDR	23.13	59.31	19.37	33.19	57.87	117.37	48.32	5.9	47.11	19.24	20.79	16.53	28.82	135.7	11.81	19.56	4.39	13.33	9.4	128.87	99.85	31.72	17.51	13.96	25.49	5.38	14.68	13.47	145.83	7.55	15.24	10.33	27.11	85.08	5.86	8.34	102.98	14.36	30.11	10.82	40.79	15.54	10.05	81.02	30.56	49.01	7.76	49.42	167.34
KIT	1618.77	760.43	2070.69	1813.57	1345.49	890.54	1421.98	1488.21	1584.2	1741.87	206.06	2126.29	964.32	2961.27	1874.1	136.9	1539.99	3351.42	1943	787.17	2648.08	621.09	1665.64	945.46	1223.33	3986.25	2814.47	2514.65	2492.67	2495.45	1756.7	1183.08	2162.08	2247.02	1850.4	951.85	1519.88	2344.91	2821.67	2051.69	854.95	2043.07	3382.96	160.74	2331.96	1761.32	2081.92	4209.74	2356.73
KRAS	133.31	61.94	70.43	75.86	91.26	69.77	75.06	103.9	59.87	115.41	31.19	93.42	40.95	135.7	64.96	25.42	42.81	65.3	104.74	80.11	63.91	57.6	60.67	62.8	73.91	114.05	70.26	101.03	81.39	128.29	90.05	82.66	38.41	69.81	117.11	95.91	108.31	80.95	105.4	84.74	21.21	60.97	119.13	31.36	56.29	116.4	84.1	336.5	111.56
L1CAM	1.36	5.27	3.52	1.19	5.56	1	7.2	4.13	25.52	3.21	1	1.44	1	4.85	1.97	9.78	2.2	1.33	2.69	13.93	7.99	1	2.5	4.65	3.4	2.15	1.05	4.49	3.39	2.52	4.16	5.17	2.26	2.18	1.46	2.09	14.2	6.53	6.02	3.61	1.63	1.2	4.31	2.61	1.61	9.19	1.29	3.53	9.51
LAMB1	253.02	301.8	378.57	429.09	199.21	324.2	341.36	389.03	540.83	424.25	215.51	311.86	166.47	562.2	251.98	287.48	983.49	466.4	130.25	473.7	655.03	353.12	272.08	229.68	884.37	514.29	441.46	300.86	417.14	206.28	422.55	366.81	164.92	499.58	368.91	371.15	406.6	459.58	600.77	283.05	115.84	465.04	317.2	57.5	492.12	1160.94	283.37	388.27	605.35
LCK	8.16	23.72	51.06	22.52	23.37	27.91	3.08	1.77	10.8	5.34	6.62	5.75	13.27	29.08	3.94	21.51	3.29	14.66	5.37	15.67	7.99	13.36	20.64	18.03	9.34	5.38	22.02	8.98	20.35	2.52	1.39	2.58	6.78	24	21.96	2.09	56.82	24.81	4.52	7.21	21.21	16.74	1.44	11.76	25.73	24.51	3.88	22.35	15.21
LIF	1.36	18.45	8.8	4.74	8.9	7.39	4.11	1.18	2.94	26.72	1	4.31	34.89	14.54	3.94	9.78	8.78	5.33	1.34	8.71	3.99	36.73	2.5	8.14	5.95	2.15	5.24	4.49	13.57	10.06	1.39	2.58	22.59	2.18	2.93	15.64	5.33	1.31	1.51	3.61	1.63	5.98	4.31	5.23	1.61	3.06	2.59	7.06	1.9
LMO1	1.36	1.32	1.76	1.19	1.11	1	1.03	1.77	1	1.07	1	1.44	1	9.69	1.97	1.96	1.1	1.33	1.34	1.74	3.99	2.5	1	1	1	2.15	2.1	2.25	3.39	5.03	1.39	10.33	2.26	4.36	1.46	1.04	1.78	1.31	4.52	1.8	4.89	1.2	1.44	1.31	1.61	3.06	1.29	4.71	3.17
LMO2	134.67	325.52	658.54	832.11	362.8	281.52	409.22	151.71	78.52	114.34	340.28	146.59	149.79	940.24	3.94	131.03	18.66	498.38	22.83	24.38	371.45	258.79	212.04	130.25	422.22	7.53	855.67	132.47	373.05	357.21	48.49	15.5	4.52	942.44	184.45	5.21	667.61	216.73	10.54	337.14	347.53	169.76	1.44	376.36	213.9	897.51	5.18	427.09	910.24
LYN	47.61	32.95	28.17	34.37	25.6	30.37	25.7	19.48	23.56	49.16	13.23	17.25	195.67	72.7	9.84	23.47	36.22	42.64	37.6	33.09	27.96	23.37	29.4	16.86	39.08	31.2	48.24	33.68	30.52	75.47	33.25	23.25	45.18	54.54	26.35	36.49	51.49	22.2	48.18	43.27	39.16	9.56	50.23	27.44	33.77	27.57	41.41	125.89	48.81
MAP3K8	12.24	51.4	42.26	35.56	25.6	23.8	16.45	15.94	19.63	12.82	19.85	14.37	18.58	29.08	13.78	25.42	4.39	27.98	2.69	73.14	23.96	27.55	20.64	24.42	45.03	13.99	49.28	8.98	23.74	15.09	8.31	12.92	51.96	37.09	20.49	39.62	37.29	19.58	30.11	14.42	22.84	19.13	58.85	13.07	30.56	6.13	14.23	32.94	20.28
MAPK10	229.89	118.61	197.21	162.39	278.22	181.39	238.54	286.9	475.06	204.11	199.44	30.18	117.55	169.63	104.34	289.44	541.14	275.84	281.98	202.02	287.57	44.24	162	50.01	84.1	95.76	146.81	318.82	149.22	289.29	217.51	72.33	47.44	316.33	112.72	98	156.25	97.92	356.85	322.72	96.26	204.43	110.52	207.78	196.21	214.42	205.73	350.62	299.19
MCL1	627.11	728.8	681.43	535.77	564.24	910.23	796.84	366	620.33	660.42	386.59	633.07	556.3	1788.39	401.59	498.7	461.01	533.03	639.16	3249.7	922.63	802.24	499.13	857.66	886.07	2146.44	804.28	716.23	878.37	694.3	773.06	340.97	831.39	894.45	548.97	870.53	971.23	911.33	661	503.01	530.27	899	1916.1	169.88	522.68	600.38	661.19	1609.54	574.29
MET	8.16	10.54	5.28	4.74	2.23	5.75	10.28	5.9	10.8	11.75	5.67	2.16	1.14	4.85	3.94	23.47	23.05	6.66	1.34	27.86	39.94	8.35	5	6.98	3.4	4.3	5.24	4.49	16.96	12.58	12.47	18.08	9.04	8.73	1.46	6.26	21.31	5.22	3.01	1.8	6.53	4.78	4.31	19.6	9.65	3.06	3.88	8.24	11.41
MLH1	62.57	85.66	89.8	62.82	104.61	73.87	63.75	79.1	58.89	55.57	63.33	74.01	65.22	58.16	112.21	91.92	85.62	105.27	88.62	106.23	151.78	36.73	79.44	61.64	100.25	131.26	85.99	92.05	132.26	62.89	108.06	67.16	81.33	124.35	111.26	33.36	95.88	94.01	58.72	117.19	107.69	60.97	130.61	83.64	64.33	73.52	122.92	98.83	112.83
MLL	175.48	148.92	239.47	132.76	111.29	89.46	88.42	178.87	110.91	111.14	101.14	125.75	87.98	198.71	98.43	156.45	176.72	175.9	134.28	207.24	159.76	114.37	96.95	101.17	135.08	231.32	152.05	188.6	105.13	166.03	116.37	149.82	164.92	198.52	114.19	108.43	165.13	122.73	131	131.61	112.58	59.77	114.82	122.84	99.71	192.98	125.51	227.08	174.31
MMP1	48.97	15.81	14.09	18.97	64.55	87	61.69	8.26	123.67	25.65	180.54	5.75	1070.12	4.85	1.97	420.47	80.13	4	34.91	24.38	11.98	148.59	180.14	999.54	172.46	24.75	147.85	74.09	16.96	22.64	162.09	100.74	31.63	4.36	40.99	2801.33	14.2	129.26	94.86	75.72	306.74	14.35	904.23	20.91	1103.26	12.25	69.87	54.12	7.61
MMP14	39.45	50.08	86.28	100.75	76.79	70.59	56.55	58.44	95.21	63.05	38.75	34.49	66.36	87.24	49.21	91.92	235.99	49.31	51.03	101.01	91.86	42.57	21.89	72.68	50.97	41.96	19.92	83.07	64.44	20.12	60.96	43.91	99.41	56.72	14.64	181.4	88.78	36.56	78.3	144.23	48.95	44.23	18.66	54.89	123.84	21.44	59.52	157.66	69.73
MMP2	654.31	48.76	110.93	257.22	25.6	60.74	166.57	724.92	1372.18	792.93	517.98	446.96	445.19	179.32	3.94	602.35	2389.56	62.63	1131.96	1666.64	183.73	192.84	280.21	100.59	631.21	741.3	347.09	1688.41	101.74	1471.61	439.17	1655.79	88.11	74.17	953.02	373.23	252.13	188.01	546.57	1388.22	443.79	8.37	130.61	148.98	1500.49	113.34	3320.2	210.6	75.43
MMP3	2.72	2.64	1.76	1.19	1.11	2.46	3.08	2.95	3.93	8.55	4.73	1	1.9	4.85	5.91	3.91	1.1	2.67	1.34	8.71	3.99	74.3	1.25	2.33	2.55	2.15	6.29	2.25	3.39	7.55	24.94	7.75	4.52	4.36	1.46	55.26	1.78	1.31	127.98	5.41	1.63	1.2	2.87	2.61	6.43	3.06	1.29	5.88	3.8
MMP9	19.04	40.86	21.13	3.56	14.47	9.85	11.31	8.26	1.96	9.62	12.29	3.59	11	43.62	3.94	11.73	9.88	2.67	1.34	15.67	15.98	23.37	13.13	19.77	15.29	6.46	28.31	51.64	3.39	12.58	22.17	10.33	85.85	6.54	14.64	7.3	47.94	6.53	3.01	5.41	13.05	16.74	5.74	26.14	12.87	18.38	1.29	18.83	5.07
MPL	1.36	1.32	5.28	1.19	1.11	2.46	1.03	1.18	2.94	2.14	2.84	1.44	1	4.85	1.97	3.91	4.39	1.33	2.69	1.74	7.99	1	1	1.16	2.55	1.08	1.05	4.49	3.39	2.52	2.77	2.58	6.78	2.18	1.46	2.09	1.78	1.31	3.01	1.8	1.63	1.2	1.44	2.61	6.43	3.06	1.29	1.18	1
MSH2	68.02	59.31	77.47	96.01	113.51	63.2	101.79	60.8	98.15	102.59	65.22	84.79	40.2	63.01	90.56	50.85	60.37	95.95	100.71	101.01	79.88	40.9	59.42	103.5	79.01	114.05	42.99	67.36	91.57	113.2	102.52	64.58	88.11	119.99	105.4	115.72	108.31	61.36	103.89	70.31	66.9	92.05	66.02	56.19	28.95	52.07	76.34	45.89	83.67
MSH6	43.53	52.72	73.95	84.16	70.11	45.96	40.1	40.14	32.39	74.8	41.59	62.52	65.6	58.16	74.81	21.51	93.3	73.29	47	90.56	67.9	48.42	63.17	91.29	70.51	51.64	46.14	56.13	94.96	32.7	74.81	80.08	85.85	82.9	67.34	47.96	69.25	30.03	76.79	50.48	37.53	76.51	48.8	47.05	45.03	49.01	64.7	77.65	65.92
MST1R	27.21	7.91	17.61	11.85	14.47	7.39	16.45	14.17	10.8	78.01	5.67	12.93	4.55	14.54	15.75	19.56	9.88	13.33	14.77	60.95	31.95	1.67	13.76	12.21	5.1	373.34	3.15	6.74	30.52	30.19	73.43	80.08	20.33	2.18	32.21	90.7	42.61	13.06	115.94	7.21	27.74	9.56	83.25	9.15	16.08	15.32	94.46	4.71	39.93
MTA1	74.82	117.29	163.75	149.35	159.14	219.15	148.06	133.41	173.73	121.82	92.63	220.6	57.26	198.71	49.21	146.68	120.74	139.92	65.8	172.41	379.44	115.2	68.18	95.94	125.73	222.71	125.83	76.34	189.92	75.47	88.67	144.66	169.44	189.8	161.03	129.28	172.23	197.15	155.09	128.01	135.42	84.88	134.92	158.12	189.77	199.11	133.27	222.37	351.16
MUC1	34.01	5.27	14.09	7.11	20.03	28.73	30.85	3.54	6.87	49.16	3.78	7.9	1.9	9.69	11.81	15.65	12.07	13.33	17.46	8.71	31.95	9.18	5.63	4.07	3.4	6.46	9.44	17.96	37.31	2.52	119.14	384.89	20.33	37.09	4.39	49	17.76	2.61	6.02	7.21	70.16	25.11	104.78	26.14	20.91	6.13	12.94	14.12	22.82
MYB	87.06	21.09	65.15	96.01	445.16	481.79	116.18	3.54	24.54	8.55	1	21.56	1.14	106.62	1.97	7.82	3.29	78.62	1.34	3.48	419.38	13.36	98.82	76.75	152.07	1.08	353.38	4.49	261.14	7.55	12.47	10.33	6.78	237.79	24.89	6.26	150.92	16.97	7.53	1.8	1.63	46.62	4.31	2.61	9.65	52.07	1.29	136.48	65.29
MYBL2	8.16	1.32	1.76	3.56	1.11	8.21	4.11	4.13	1	12.82	1.89	8.62	8.72	4.85	9.84	5.87	2.2	5.33	1.34	8.71	3.99	1.67	10.01	7.56	13.59	2.15	12.58	4.49	6.78	12.58	15.24	7.75	6.78	4.36	48.31	3.13	1.78	5.22	4.52	1.8	4.89	9.56	11.48	5.23	1.61	9.19	6.47	7.06	13.95
MYC	21.77	115.98	100.36	114.98	144.68	97.67	107.96	18.3	39.26	30.99	75.62	15.09	21.61	329.57	41.34	107.56	2.2	53.3	13.43	221.17	127.81	97.67	44.41	106.41	27.19	11.84	31.46	29.19	145.83	22.64	19.4	15.5	103.92	161.44	7.32	29.19	223.72	33.95	6.02	34.25	70.16	44.23	11.48	92.78	83.63	104.15	3.88	163.54	126.14
MYCL1	4.08	9.23	7.04	1.19	2.23	13.13	3.08	3.54	1.96	4.27	2.84	2.16	3.41	9.69	269.7	3.91	1.1	1.33	4.03	1.74	7.99	6.68	3.75	5.81	2.55	2.15	7.34	2.25	10.17	2.52	2.77	10.33	2.26	8.73	1.46	1.04	8.88	9.14	3.01	1.8	6.53	1.2	7.18	1.31	4.82	6.13	3.88	1.18	6.34
MYCN	1.36	1.32	1.76	1.19	1.11	4.1	2.06	3.54	4.91	266.09	7.56	1	4.93	4.85	1.97	1.96	2.2	2.67	4.03	1.74	3.99	4.17	1.88	2.33	3.4	8.61	6.29	13.47	3.39	105.65	34.64	74.91	4.52	8.73	453.82	39.62	10.65	1.31	137.02	1.8	9.79	5.98	123.43	7.84	1.61	3.06	28.47	5.88	2.54
NF1	352.32	258.31	387.37	323.6	409.54	305.33	125.44	221.37	263.05	226.55	236.3	274.5	186.19	334.41	248.04	211.21	319.41	381.12	286.01	222.92	527.22	188.66	255.19	205.84	292.24	411	367.01	300.86	318.79	254.07	358.82	209.23	232.7	477.77	335.24	197.04	324.93	288.54	310.17	266.83	239.84	271.37	328.68	202.56	249.28	73.52	318.3	422.39	401.87
NGFR	16.32	176.6	22.89	27.26	30.05	9.85	13.37	1.77	18.65	6.41	8.51	15.81	2.65	116.32	31.5	27.38	9.88	2.67	9.4	22.64	11.98	89.32	21.27	11.05	47.57	7.53	26.22	85.32	23.74	2.52	12.47	25.83	76.81	10.91	1.46	35.45	31.96	60.06	6.02	19.83	11.42	7.17	7.18	10.45	72.37	52.07	1.29	14.12	16.48
NOTCH1	31.29	86.98	45.78	72.31	52.31	64.84	40.1	11.81	36.32	29.92	54.82	36.65	117.93	130.86	11.81	58.67	114.15	35.98	38.94	114.94	79.88	81.81	55.67	86.06	45.88	26.9	28.31	20.21	57.65	2.52	18.01	20.67	155.89	45.81	16.1	56.3	49.72	32.64	36.14	27.04	55.47	28.69	45.93	75.79	56.29	27.57	19.41	57.65	69.09
NPM1	10.88	13.18	10.56	3.56	12.24	9.85	10.28	10.63	17.67	8.55	6.62	3.59	5.69	4.85	17.72	17.6	15.37	10.66	12.09	31.35	11.98	12.52	3.75	2.91	4.25	12.91	3.15	13.47	16.96	7.55	6.93	2.58	15.81	13.09	10.25	1.04	12.43	2.61	3.01	16.23	13.05	7.17	5.74	1.31	3.22	15.32	7.76	3.53	10.14
NQO1	269.34	55.35	89.8	93.64	102.39	74.69	154.23	115.7	256.18	226.55	55.77	61.08	37.16	63.01	104.34	88.01	94.4	74.62	72.51	177.64	103.85	132.73	51.91	34.31	55.22	415.3	106.96	92.05	108.52	60.37	288.16	702.61	101.67	87.26	510.91	366.98	81.68	35.25	240.91	113.58	114.21	83.68	124.87	71.87	62.72	24.51	297.6	49.42	117.27
NRAS	23.13	31.63	31.69	28.45	28.94	33.65	34.96	25.38	25.52	36.33	21.74	20.84	22.75	82.39	21.65	25.42	40.61	27.98	26.86	53.99	51.92	31.72	22.52	18.03	33.13	47.34	29.36	44.9	57.65	35.22	26.32	25.83	31.63	52.36	42.45	16.68	49.72	31.34	40.65	32.45	35.9	22.71	44.49	16.99	30.56	27.57	24.58	32.94	43.74
NTRK1	4.08	3.95	1.76	5.93	1.11	4.1	1.03	1.77	2.94	2.14	1	1	4.17	4.85	1.97	1.96	2.2	5.33	2.69	3.48	3.99	5.84	2.5	1	1	2.15	4.19	2.25	3.39	10.06	2.77	2.58	2.26	2.18	2.93	1.04	1.78	2.61	1.51	1.8	1.63	1.2	5.74	5.23	3.22	3.06	1.29	1.18	1.27
NTRK2	6.8	537.7	825.81	1315.73	789.04	505.59	1390.11	85.01	197.29	9.62	63.33	153.06	7.96	799.69	139.77	86.05	5.49	1461.83	14.77	137.58	2032.99	113.53	5.63	348.88	27.19	8.61	14.68	71.85	1000.46	22.64	31.86	5.17	169.44	1422.39	2.93	6.26	1083.09	332.94	7.53	1.8	432.37	77.71	7.18	125.45	313.61	897.51	2.59	164.72	1781.81
NTRK3	2.72	1.32	1.76	2.37	1.11	1	2.06	2.36	2.94	1.07	3.78	1	1	14.54	3.94	1.96	1.1	2.67	1.34	26.12	3.99	1	1	2.33	1	1.08	1.05	2.25	3.39	2.52	1.39	2.58	2.26	6.54	1.46	1.04	7.1	1.31	1.51	1.8	1.63	1.2	1.44	1.31	1.61	3.06	1.29	2.35	3.8
NUMA1	204.05	229.32	156.71	177.8	217.01	125.58	123.38	402.6	203.18	221.21	208.89	166.71	141.06	218.1	149.61	170.14	304.05	241.2	240.36	348.31	343.49	212.87	112.59	137.81	201.34	320.62	191.9	305.35	203.48	284.26	278.47	415.89	210.11	346.87	139.07	231.45	257.46	203.68	322.22	252.4	197.42	102.81	236.82	189.49	218.72	171.54	271.72	311.79	342.92
OGG1	63.93	56.67	88.04	47.41	55.64	45.96	65.8	69.66	78.52	75.87	51.04	61.8	62.95	72.7	57.09	68.45	80.13	87.95	51.03	118.42	83.88	24.21	60.05	50.59	50.97	80.69	68.16	76.34	40.7	85.53	69.27	72.33	61	95.99	74.66	34.4	81.68	60.06	88.84	66.71	66.9	38.26	88.99	57.5	61.11	36.76	138.45	78.83	77.97
PCNA	72.1	71.17	81	64.01	46.74	45.14	46.27	52.54	29.45	95.11	42.53	91.98	79.25	111.47	102.37	78.23	71.35	89.28	53.71	67.92	135.8	85.15	135.1	180.25	51.82	49.49	80.74	58.38	122.09	70.44	98.36	72.33	198.81	122.17	109.79	52.13	62.14	73.12	69.26	63.1	50.58	121.94	77.51	57.5	70.76	76.58	46.58	102.36	73.53
PCTK1	330.56	197.69	250.03	221.66	286.01	327.49	222.09	200.71	196.31	272.5	184.32	197.61	222.97	339.26	340.57	252.28	249.16	215.88	255.13	224.66	519.23	228.73	245.81	208.75	323.67	261.45	335.56	224.52	322.18	291.81	279.85	273.81	171.7	338.14	329.38	184.53	314.27	249.38	346.31	297.48	251.27	174.54	394.7	329.32	229.98	340.01	296.31	570.63	320.74
PDGFA	63.93	59.31	82.76	120.9	96.82	129.68	48.32	5.9	24.54	18.17	15.12	17.25	24.27	218.1	59.06	39.11	9.88	81.29	36.26	92.3	131.8	20.87	31.27	15.12	15.29	7.53	18.87	22.45	139.05	15.09	23.55	28.41	31.63	37.09	23.42	25.02	87	16.97	10.54	34.25	32.63	94.44	12.92	18.3	41.81	88.83	11.65	98.83	99.52
PDGFRA	489.71	35.58	174.32	284.48	33.39	105.06	179.93	1234.96	4094.96	691.41	5051.22	467.8	363.66	455.58	3.94	4930.25	117.45	297.16	104.74	350.05	467.31	353.12	385.92	91.29	275.25	1517.03	3440.49	1746.78	132.26	407.52	592.95	227.32	244	93.81	187.38	1014.4	227.27	438.69	1832.43	1714.55	5082.41	9.56	100.47	3301	2626.27	42.88	256.2	2351.95	131.84
PDGFRB	59.85	85.66	144.38	295.15	105.72	93.57	156.28	136.96	101.1	64.12	88.85	64.67	64.47	227.79	43.31	105.61	38.42	109.27	51.03	607.79	187.72	180.32	62.55	127.92	98.55	111.89	26.22	24.7	176.35	15.09	65.11	49.08	92.63	119.99	30.74	161.6	312.5	62.67	94.86	57.69	128.9	83.68	73.2	177.73	24.12	52.07	25.88	223.55	180.65
PGK1	765.86	1250.69	1375.18	995.68	2586.36	1445.38	1208.12	580.29	722.41	1545.25	656.92	916.91	577.91	1531.52	931.15	737.29	527.97	1118.03	708.99	734.93	1973.08	1463.39	502.26	607.05	977.82	1040.41	1428.21	1207.93	1502.39	1516.89	1598.76	687.12	876.58	1738.72	2134.41	1508.57	1370.73	839.52	3628.72	1366.59	877.8	663.49	1043.45	649.48	1585.73	1206.89	1379.32	3634.4	1686.73
PIK3CA	69.38	119.93	119.73	112.61	139.11	94.39	129.55	100.95	109.93	101.52	88.85	88.39	42.09	189.02	86.62	80.18	99.89	121.26	91.31	128.87	139.79	79.31	60.05	70.36	120.63	123.73	110.1	107.77	115.31	90.56	103.91	90.41	131.03	181.07	93.69	77.15	163.35	108.37	99.38	102.76	79.95	71.73	104.78	74.49	85.24	98.02	91.87	208.25	141.99
PIM1	53.05	80.39	38.74	61.64	32.27	28.73	19.54	14.76	19.63	33.13	20.79	25.15	50.06	150.24	15.75	74.32	15.37	38.64	12.09	158.48	91.86	87.65	62.55	31.4	54.37	18.29	59.77	20.21	74.61	10.06	24.94	33.58	51.96	32.72	23.42	44.83	55.04	44.39	24.09	16.23	31	13.15	7.18	27.44	38.6	39.82	2.59	54.12	29.79
PLA2G2A	8.16	3.95	65.15	3.56	1.11	14.77	6.17	4.13	70.67	4.27	2.84	12.93	1.14	4.85	3.94	5.87	7.68	1.33	4.03	17.42	171.75	4.17	80.06	34.89	84.95	4.3	220.21	2.25	84.78	7.55	26.32	23.25	259.81	2.18	1.46	51.08	31.96	61.36	3.01	3.61	3.26	9.56	8.61	9.15	14.47	15.32	3.88	15.3	87.47
PLAT	7272.24	1619.7	4026.92	216.92	345	1633.33	4951.74	12491.3	11712.6	17094.9	2057.73	1866.88	5595.18	6000.08	3360.39	10859.8	136.11	710.26	10270.9	435.38	2420.42	545.12	3375.69	934.42	3589.29	8654.63	15369.5	16520.3	2587.63	16207.9	11864.6	5564.08	975.98	6086.6	8329.74	4344.3	894.88	2410.19	14960.6	15798.7	6066.25	314.41	12514.2	292.72	11930	3994.38	7292.54	30.59	3265.7
PLAUR	48.97	98.84	35.22	45.04	64.55	33.65	40.1	11.81	18.65	58.77	19.85	28.02	38.68	87.24	21.65	41.07	18.66	29.32	14.77	81.85	19.97	225.39	33.78	40.12	30.58	25.82	44.04	17.96	33.91	15.09	36.02	38.75	438.29	39.27	49.77	102.17	79.9	20.89	78.3	14.42	22.84	32.28	54.54	30.06	17.69	18.38	28.47	77.65	36.76
PLG	1.36	1.32	1.76	1.19	1.11	1	1.03	1.77	1	1.07	2.84	1	1	4.85	1.97	1.96	1.1	1.33	2.69	3.48	3.99	1	1	1	1	1.08	1.05	2.25	3.39	2.52	2.77	2.58	2.26	2.18	1.46	1.04	1.78	1.31	1.51	1.8	1.63	1.2	2.87	2.61	1.61	3.06	2.59	1.18	1.27
PML	66.66	68.53	86.28	53.34	36.73	28.73	61.69	61.98	54.97	33.13	54.82	51.02	42.47	82.39	63	125.16	43.91	49.31	48.34	109.72	95.86	41.74	44.41	30.82	39.93	93.6	66.06	74.09	57.65	67.92	48.49	46.5	56.48	32.72	76.12	90.7	56.82	56.14	120.46	90.14	73.42	39.45	106.21	70.57	67.55	30.63	59.52	34.12	35.5
PPARG	8.16	23.72	15.85	3.56	11.13	9.85	7.2	2.95	30.43	3.21	2.84	5.03	3.79	43.62	7.87	5.87	8.78	5.33	4.03	20.9	19.97	11.69	10.63	8.14	8.5	7.53	7.34	4.49	20.35	5.03	27.71	31	6.78	8.73	8.78	9.38	7.1	13.06	6.02	1.8	14.68	5.98	7.18	14.37	6.43	15.32	3.88	15.3	21.55
PRKAR1A	2285.33	1407.52	1945.67	1415.29	2005.43	1822.11	2002.9	1207.22	1448.74	1231.07	1673.97	811.28	1302.19	2025.87	1376.05	1413.95	1378.64	1838.95	2117.56	1145.93	2328.55	702.9	945.72	802.42	1171.51	1471.85	1513.14	2000.49	1437.95	2143.27	1271.8	687.12	652.92	2585.17	922.27	1844.27	1914.06	1172.46	1029.89	1438.7	1505.96	1132.12	1258.74	899.08	1304.29	1102.74	1555.29	3688.52	2020.78
PTEN	214.93	307.07	346.88	270.26	411.77	348.01	311.54	257.38	283.66	325.93	218.34	162.4	105.04	436.19	248.04	332.46	254.65	415.76	400.15	80.11	379.44	164.45	212.66	254.1	224.28	542.26	272.64	442.31	298.44	566.01	281.24	276.4	176.22	499.58	307.42	414.93	458.1	327.71	344.8	382.21	367.11	282.13	315.76	253.52	295.92	245.05	284.66	918.9	517.24
PTGS2	23.13	38.22	8.8	9.48	5.56	4.92	15.42	13.58	24.54	30.99	6.62	13.65	9.48	24.23	15.75	41.07	6.59	8	10.74	64.44	15.98	40.9	13.13	10.47	16.99	20.44	14.68	20.21	10.17	22.64	29.09	12.92	40.67	21.82	5.86	51.08	35.51	6.53	28.61	18.03	17.95	14.35	110.52	1.31	12.87	6.13	20.7	11.77	6.97
PTHLH	9.52	2.64	10.56	14.22	4.45	2.46	22.62	7.08	6.87	4.27	4.73	66.11	15.55	19.39	1.97	11.73	13.17	6.66	22.83	12.19	51.92	2.5	6.25	1.16	5.1	5.38	9.44	6.74	13.57	27.67	1.39	7.75	2.26	8.73	4.39	3.13	17.76	14.36	1.51	9.01	14.68	2.39	10.05	22.22	6.43	12.25	3.88	21.18	39.93
PTK7	82.98	3.95	19.37	41.49	44.52	29.55	9.25	14.76	17.67	97.25	148.4	73.3	36.4	43.62	33.47	138.85	143.79	49.31	34.91	40.06	111.83	59.27	84.44	14.54	50.97	1.08	88.08	40.41	50.87	52.83	56.8	59.41	18.07	6.54	68.8	14.6	7.1	33.95	115.94	9.01	50.58	11.95	1.44	44.43	61.11	3.06	62.11	76.48	23.45
PTPN11	175.48	160.78	288.77	222.84	225.92	228.99	214.89	152.89	190.42	210.52	149.34	143.72	105.04	256.87	287.42	174.05	110.86	202.55	151.73	175.89	211.69	116.87	110.08	123.85	163.11	125.88	138.42	204.32	206.87	319.48	155.17	108.49	108.44	386.14	184.45	180.36	216.62	148.84	177.67	165.87	122.37	106.4	160.75	111.08	138.31	226.67	133.27	454.15	268.13
PTPRG	38.09	31.63	66.91	33.19	55.64	18.06	94.59	69.66	110.91	45.95	27.41	58.21	17.82	53.31	27.56	48.89	58.17	51.97	64.45	80.11	143.79	12.52	55.04	65.71	79.86	118.35	71.31	29.19	50.87	47.8	48.49	25.83	11.3	76.36	29.28	86.53	83.45	73.12	43.67	52.28	44.05	58.58	41.62	31.36	77.2	33.69	109.98	148.25	79.23
RAD54L	8.16	6.59	7.04	3.56	1.11	4.92	6.17	5.9	4.91	6.41	4.73	5.75	14.41	9.69	9.84	5.87	10.98	10.66	5.37	5.22	11.98	3.34	8.13	8.14	10.19	7.53	8.39	2.25	3.39	5.03	19.4	20.67	6.78	2.18	21.96	7.3	1.78	3.92	1.51	5.41	6.53	7.17	15.79	2.61	3.22	9.19	14.23	4.71	5.07
RAF1	190.44	189.78	241.23	163.58	307.16	261	230.31	155.85	163.92	191.29	207	198.33	145.24	310.18	277.57	187.74	171.23	239.86	173.22	229.88	243.64	116.87	185.14	187.23	190.3	243.16	218.11	287.39	332.36	198.73	192.57	152.41	153.63	307.6	212.27	79.23	280.54	223.26	215.31	196.51	197.42	131.5	255.48	163.35	160.82	171.54	214.79	415.33	260.52
RARA	13.6	40.86	29.93	21.34	44.52	27.91	28.79	17.71	13.74	25.65	37.81	25.15	30.72	82.39	72.84	54.76	46.1	27.98	32.23	45.28	47.93	48.42	20.64	18.03	14.44	29.05	26.22	15.72	71.22	12.58	23.55	23.25	45.18	28.36	21.96	38.57	40.84	16.97	40.65	32.45	48.95	22.71	31.58	33.98	27.34	15.32	15.53	62.36	34.86
RB1	119.71	126.52	119.73	84.16	131.32	117.37	93.56	103.31	82.45	118.62	105.86	68.27	34.89	126.01	190.95	86.05	99.89	138.59	114.14	83.59	223.67	77.64	15.01	13.37	136.78	146.32	142.61	85.32	94.96	88.05	112.22	72.33	20.33	189.8	118.58	88.62	147.37	63.98	129.49	140.63	93	23.91	142.09	73.18	86.85	79.64	137.16	167.07	148.33
REL	9.52	18.45	12.33	22.52	20.03	11.49	20.56	14.76	12.76	20.3	7.56	26.59	16.69	29.08	23.62	13.69	10.98	15.99	18.8	41.8	27.96	17.53	6.25	16.28	17.84	18.29	12.58	22.45	10.17	32.7	18.01	25.83	11.3	26.18	16.1	8.34	31.96	6.53	18.07	23.44	19.58	14.35	27.27	14.37	12.87	12.25	9.06	4.71	20.92
RET	2.72	3.95	10.56	2.37	3.34	2.46	4.11	1	1	1.07	1	2.16	6.07	14.54	5.91	1.96	5.49	5.33	4.03	5.22	19.97	4.17	3.75	2.91	1	5.38	1.05	2.25	3.39	7.55	1.39	5.17	4.52	13.09	2.93	3.13	7.1	6.53	1.51	1.8	1.63	1.2	1.44	6.53	3.22	15.32	1.29	3.53	3.8
RRM1	80.26	43.49	142.62	98.38	72.34	58.27	57.58	116.88	76.56	151.75	88.85	135.81	94.8	82.39	59.06	78.23	69.15	99.94	77.88	116.68	163.76	55.1	115.71	77.92	107.04	90.38	75.5	96.54	78	85.53	135.77	126.57	83.59	157.07	137.61	91.74	115.41	87.48	118.95	88.34	63.63	115.96	57.41	129.37	61.11	82.71	108.69	125.89	133.11
S100A4	57.13	148.92	207.77	175.43	91.26	140.35	140.86	47.23	139.38	36.33	79.4	33.05	82.29	198.71	7.87	170.14	73.54	55.97	41.63	1274.8	143.79	65.11	85.06	149.44	40.78	11.84	84.94	24.7	152.61	88.05	70.66	64.58	214.63	113.44	43.92	92.79	566.4	78.34	58.72	79.33	86.47	35.86	27.27	86.25	64.33	70.45	27.17	102.36	155.93
SERPINE1	111.55	752.52	31.69	273.81	134.66	56.63	54.49	7.08	13.74	223.34	35.92	84.79	100.49	2423.3	1.97	99.74	12.07	5.33	16.11	4874.54	67.9	1541.03	42.53	330.27	101.09	79.62	85.99	33.68	223.83	35.22	159.32	5.17	614.51	124.35	13.18	302.34	149.15	7.83	234.89	16.23	13.05	96.83	28.71	7.84	32.16	134.78	12.94	125.89	21.55
SFPQ	482.91	512.66	734.25	689.87	774.57	751	773.19	837.67	873.56	932.92	668.27	559.78	458.84	770.61	496.09	637.55	1004.34	780.89	632.45	1314.86	938.61	384.84	484.12	598.33	632.91	1667.66	682.64	689.28	827.5	880.45	890.82	710.36	420.22	1114.79	935.45	483.74	877.13	592.76	882.34	950.12	815.8	569.05	687.5	543.63	559.67	952.65	980.79	750.65	933.06
SIAH1	23.13	21.09	14.09	15.41	21.14	10.67	8.23	13.58	9.82	22.44	6.62	17.96	14.41	24.23	17.72	11.73	23.05	10.66	21.48	19.16	31.95	22.54	16.26	10.47	16.14	21.52	20.97	6.74	13.57	17.61	22.17	18.08	36.15	26.18	27.81	18.77	14.2	11.75	15.06	10.82	13.05	15.54	5.74	11.76	11.26	21.44	16.82	31.77	24.09
SOD1	102.02	65.9	75.71	55.71	125.76	54.17	84.31	57.26	61.84	66.26	59.55	33.05	75.08	121.16	47.25	62.58	74.64	115.93	81.91	106.23	127.81	52.59	39.4	23.26	77.31	52.72	53.48	58.38	98.35	67.92	45.72	28.41	63.26	119.99	39.53	52.13	101.21	18.28	67.76	64.9	62	63.36	45.93	36.59	45.03	85.77	54.34	92.95	77.97
SPI1	58.49	210.86	75.71	124.46	48.97	78.79	50.38	28.34	62.82	23.51	48.21	37.37	113	116.32	17.72	72.36	51.59	51.97	53.71	168.93	99.85	153.6	58.17	74.43	63.72	36.58	115.35	42.66	101.74	25.16	33.25	28.41	225.92	109.08	30.74	57.34	136.72	54.84	73.78	77.52	112.58	38.26	37.32	58.81	106.14	88.83	33.64	90.6	57.68
SPP1	58.49	253.04	7.04	45.04	758.99	104.24	13.37	4.72	12.76	28.85	2.84	28.02	19.72	9.69	45.28	7.82	10.98	1.33	5.37	34.83	31.95	1520.99	11.26	135.48	11.04	94.68	206.58	22.45	3.39	98.11	105.29	7.75	1900.01	117.81	89.3	429.53	33.74	3.92	490.86	91.95	1.63	52.6	195.2	2.61	48.25	3.06	116.45	22.35	2.54
STAT1	1183.47	519.25	1445.61	851.07	827.99	1164.67	378.37	348.88	198.27	259.68	332.72	1345.9	1070.5	1337.66	291.35	539.77	406.13	747.57	300.78	487.63	714.94	677.85	1450.47	365.74	1027.94	1007.05	2612.09	1255.08	1366.73	389.91	368.52	273.81	417.96	1505.29	1210.67	301.3	674.71	2000.22	296.62	365.99	399.74	767.5	1339.12	458.69	2396.29	447.22	351.95	1361.28	459.56
STAT3	931.82	1149.21	1003.65	678.01	948.18	694.37	595.32	568.48	449.54	605.92	582.25	643.13	538.85	1672.07	610.26	737.29	1088.86	742.24	901	963.07	1170.27	693.71	703.03	623.33	750.14	856.43	1015.05	1104.65	820.72	1197.42	623.43	477.88	804.28	1202.05	560.68	745.42	681.82	782.07	718.22	564.3	711.37	523.62	518.14	445.62	939.22	820.93	604.26	2266.06	697.89
SYK	174.12	64.58	24.65	41.49	17.81	34.47	31.87	106.26	152.14	17.1	37.81	17.25	118.31	72.7	9.84	29.34	99.89	22.65	243.04	85.33	63.91	35.06	217.04	21.51	236.17	18.29	116.4	188.6	74.61	30.19	152.39	18.08	61	30.54	16.1	31.28	58.59	63.98	42.16	187.5	73.42	11.95	21.53	88.86	109.36	58.2	124.22	23.53	33.6
TAL1	4.08	13.18	8.8	3.56	6.68	8.21	12.34	2.95	5.89	1.07	2.84	2.87	4.17	29.08	3.94	9.78	1.1	4	1.34	13.93	11.98	10.85	2.5	2.91	2.55	6.46	4.19	8.98	16.96	5.03	6.93	18.08	6.78	13.09	1.46	4.17	8.88	10.45	1.51	5.41	6.53	2.39	4.31	7.84	1.61	6.13	2.59	8.24	6.97
TEK	1.36	18.45	15.85	8.3	5.56	6.57	12.34	4.72	10.8	1.07	1.89	4.31	5.31	4.85	1.97	7.82	2.2	13.33	5.37	19.16	15.98	4.17	4.38	3.49	5.1	1.08	4.19	2.25	30.52	2.52	5.54	7.75	4.52	6.54	4.39	1.04	23.08	5.22	3.01	1.8	6.53	1.2	7.18	7.84	8.04	3.06	1.29	7.06	18.38
TERT	1.36	1.32	5.28	2.37	2.23	1.64	1.03	1.18	1	17.1	1	5.03	14.03	4.85	3.94	1.96	1.1	1.33	1.34	1.74	3.99	4.17	1.88	4.65	1.7	29.05	11.53	2.25	3.39	2.52	9.7	5.17	4.52	4.36	2.93	4.17	1.78	1.31	7.53	1.8	3.26	1.2	18.66	1.31	1.61	3.06	23.29	7.06	1
TFDP1	47.61	50.08	86.28	48.6	75.68	86.18	95.62	114.52	57.91	78.01	42.53	60.36	29.58	145.4	122.05	68.45	75.74	99.94	89.97	92.3	139.79	30.05	37.53	54.66	63.72	35.51	62.92	87.56	108.52	108.17	81.74	82.66	29.37	150.53	86.37	76.11	95.88	35.25	73.78	90.14	78.32	50.21	66.02	60.11	64.33	70.45	90.57	182.37	114.73
TFE3	118.35	68.53	45.78	53.34	89.03	56.63	50.38	68.48	90.3	66.26	70.89	20.84	47.4	96.93	45.28	68.45	75.74	57.3	114.14	69.66	63.91	65.95	43.78	29.07	54.37	96.83	56.62	116.75	57.65	145.9	63.73	43.91	15.81	117.81	51.24	83.4	81.68	54.84	87.33	99.16	68.53	62.16	76.07	48.35	67.55	70.45	59.52	212.96	74.16
TFRC	130.59	147.61	170.8	177.8	175.84	103.42	158.34	77.92	131.53	1281.29	86.01	208.39	132.34	266.56	114.18	80.18	94.4	157.24	65.8	259.49	143.79	111.03	244.56	91.29	835.09	139.87	92.28	226.77	400.18	269.17	663.61	196.32	101.67	237.79	1112.58	93.83	170.45	79.64	204.77	86.54	78.32	145.85	670.28	78.41	204.25	140.91	128.1	157.66	232.63
TGFA	1.36	2.64	7.04	3.56	2.23	1.64	5.14	4.13	2.94	4.27	2.84	1	2.28	4.85	1.97	3.91	1.1	8	6.71	3.48	3.99	2.5	4.38	2.33	11.04	2.15	8.39	4.49	6.78	5.03	2.77	20.67	4.52	4.36	2.93	5.21	7.1	1.31	4.52	1.8	3.26	1.2	5.74	2.61	6.43	3.06	2.59	10.59	6.97
TGFB1	205.41	175.28	220.1	158.84	185.85	218.32	306.4	350.65	188.45	252.2	202.28	138.69	197.19	479.81	53.15	426.34	542.23	185.23	150.39	372.69	599.11	138.58	155.12	177.35	157.16	686.43	163.58	334.54	291.66	118.23	174.56	142.07	560.29	239.97	114.19	593.21	348.01	173.65	359.86	344.35	380.16	193.67	249.74	190.79	188.16	125.59	725.89	277.67	300.45
TGFBI	1077.37	488.94	218.34	128.02	241.5	2920.3	167.59	119.25	7330.09	284.26	6749.77	99.16	1258.58	334.41	21.65	7498.04	162.45	54.64	1232.67	923.01	207.69	419.07	138.86	990.24	126.58	505.68	2757.84	480.48	152.61	1209.99	615.12	183.4	698.1	113.44	305.96	245	259.23	665.87	1227.14	2801.69	5718.73	560.68	268.4	1430.95	1915.42	116.4	65.99	1389.52	480.47
TGFBR2	254.38	285.99	257.08	258.4	181.4	218.32	214.89	155.85	359.24	132.51	215.51	232.1	172.92	460.43	159.46	287.48	231.6	237.2	228.27	330.89	471.3	124.38	154.49	145.95	185.2	139.87	458.24	222.28	352.7	211.31	141.31	92.99	122	305.42	99.55	197.04	330.25	308.13	144.55	155.05	398.11	163.78	97.6	198.63	168.87	183.79	179.86	955.37	327.08
TGFBR3	80.26	59.31	142.62	28.45	18.92	28.73	16.45	69.66	54.97	28.85	41.59	15.81	20.48	96.93	41.34	91.92	107.57	27.98	130.25	107.97	79.88	44.24	39.4	16.86	56.07	115.12	77.6	127.98	27.13	65.41	49.87	36.16	31.63	30.54	68.8	60.47	42.61	31.34	42.16	57.69	50.58	17.93	117.69	30.06	27.34	64.33	31.05	57.65	24.72
THPO	5.44	5.27	1.76	3.56	1.11	1	2.06	1	2.94	3.21	1.89	1	2.65	14.54	5.91	9.78	5.49	6.66	1.34	6.97	3.99	1	1	2.33	1.7	2.15	1.05	2.25	3.39	2.52	4.16	7.75	2.26	2.18	5.86	1.04	1.78	3.92	1.51	1.8	4.89	3.59	2.87	3.92	1.61	3.06	1.29	2.35	1.27
TIMP1	2081.28	3883.86	2620.05	1303.87	1832.93	3939.7	2876.86	1172.39	792.1	888.04	2165.49	394.5	1859.25	2263.36	309.07	3725.55	874.82	1512.47	1634.16	1694.51	1134.32	3021.95	420.32	1126.3	951.48	1280.33	1298.18	1854.55	1159.86	1189.87	781.37	578.62	1427.83	1507.47	748.07	3385.15	1608.66	928.3	1279.84	1469.35	1440.69	576.22	1390.79	3291.85	863.63	967.96	1539.77	1794.26	997.08
TIMP2	861.08	984.47	663.82	433.83	527.51	382.48	536.71	485.84	929.51	333.41	1332.75	388.75	270.37	833.61	271.67	1650.59	633.34	578.34	1182.99	1286.99	639.05	314.72	170.13	323.88	474.04	264.67	681.6	1115.88	451.05	638.96	306.17	330.64	503.81	536.67	159.57	482.7	665.84	468.72	432.13	775.24	1512.48	268.98	223.9	2071.29	762.31	196.04	327.36	1313.04	686.48
TIMP3	1194.36	4563.9	6993.85	4324.12	2430.56	2303.08	5402.08	1374.28	1093.43	569.58	1790.24	1365.31	2009.79	5801.37	3563.16	4151.89	1372.05	1842.95	1793.95	3507.44	3386.99	757.16	537.28	1096.64	389.94	1175.97	1264.62	639.89	6372.42	528.27	797.99	1257.99	5076.48	5621.93	303.03	3168.3	3252.83	799.05	874.81	539.06	1470.06	1017.35	1479.77	1221.86	738.19	4407.91	1149	2308.42	2628.66
TNF	5.44	10.54	3.52	1.19	3.34	8.21	5.14	2.36	3.93	1.07	2.84	1	6.83	24.23	1.97	11.73	3.29	5.33	5.37	10.45	3.99	9.18	8.13	1.16	4.25	4.3	8.39	2.25	3.39	5.03	11.08	7.75	11.3	4.36	10.25	2.09	1.78	5.22	3.01	3.61	8.16	7.17	2.87	7.84	6.43	3.06	2.59	5.88	9.51
TNFRSF10B	25.85	34.27	35.22	33.19	45.63	31.19	26.73	14.76	19.63	63.05	14.18	28.02	35.27	14.54	31.5	27.38	10.98	31.98	18.8	73.14	67.9	55.93	28.15	40.12	57.77	12.91	34.6	29.19	10.17	37.73	31.86	82.66	22.59	39.27	81.98	21.89	17.76	35.25	51.19	52.28	39.16	7.17	64.59	33.98	20.91	58.2	25.88	75.3	47.54
TNFRSF1B	91.14	268.85	84.52	118.53	37.84	73.87	73	40.14	83.43	81.22	32.14	35.93	78.12	281.1	13.78	107.56	58.17	58.63	64.45	177.64	143.79	189.5	80.06	73.26	70.51	45.19	122.69	85.32	101.74	45.28	36.02	64.58	359.22	102.53	62.95	112.6	168.68	56.14	106.9	79.33	96.26	50.21	57.41	45.74	83.63	85.77	28.47	157.66	71.63
TNFSF10	326.48	305.75	1121.62	938.79	880.3	594.24	440.06	123.38	515.31	561.03	231.58	592.83	152.06	1342.51	750.04	205.35	315.02	687.61	386.72	135.84	898.67	455.8	349.01	312.25	726.35	160.31	769.68	426.59	769.85	613.8	626.2	459.8	440.55	940.26	490.42	123.02	443.89	517.03	654.98	364.18	394.85	307.24	337.29	263.98	818.6	214.42	508.51	522.39	694.09
TOP1	214.93	289.94	413.79	307	429.58	460.45	305.37	298.12	388.69	461.65	207	823.5	205.15	571.9	234.26	285.53	238.19	369.12	234.99	316.96	347.49	280.49	236.43	198.86	725.5	556.25	472.92	390.67	396.79	206.28	374.06	302.23	122	536.67	300.1	353.42	440.34	827.77	402.02	393.03	323.05	316.8	271.27	189.49	506.6	526.87	292.43	903.6	464.63
TOP2A	31.29	18.45	40.5	17.78	3.34	15.59	20.56	15.94	4.91	47.02	24.58	58.92	73.57	9.69	98.43	13.69	19.76	27.98	8.06	5.22	3.99	7.51	78.18	73.26	93.45	34.43	39.85	8.98	20.35	25.16	108.06	64.58	72.3	2.18	137.61	27.11	28.41	13.06	15.06	7.21	17.95	52.6	30.14	7.84	17.69	6.13	47.88	40	20.28
TP53	103.38	131.79	167.27	194.4	232.59	108.34	151.14	87.37	68.71	269.3	112.48	71.86	99.35	198.71	92.52	125.16	132.81	174.57	111.45	113.2	179.73	140.25	78.18	154.67	225.98	68.86	75.5	92.05	186.53	103.14	192.57	157.57	110.7	248.7	207.88	155.34	202.41	107.06	135.51	84.74	99.53	105.2	103.34	111.08	130.27	125.59	190.21	310.61	192.06
TPR	110.19	137.06	206.01	137.5	161.37	187.96	215.92	108.62	137.41	135.72	106.81	116.41	84.56	145.4	127.96	80.18	132.81	179.9	142.33	161.96	231.66	83.48	122.59	91.29	129.13	162.46	171.97	119	183.14	138.36	121.92	118.82	119.74	301.06	120.04	109.47	181.11	95.31	147.56	171.27	132.16	153.02	202.37	79.72	131.88	101.08	104.81	211.78	178.12
TUBB	233.97	192.41	299.33	331.89	410.66	236.38	318.74	321.73	281.7	454.17	344.06	273.78	248	494.35	466.56	289.44	466.5	628.97	248.41	539.87	439.35	230.4	357.15	472.15	287.14	351.82	297.81	321.07	417.14	296.84	414.24	317.73	255.29	434.13	409.9	193.91	381.75	225.87	460.74	315.51	280.63	405.27	268.4	256.13	262.14	202.17	420.52	505.92	342.29
TYMS	142.83	36.9	73.95	69.93	61.21	36.93	39.07	98.58	10.8	218	50.1	127.91	331.43	72.7	181.11	58.67	70.25	125.26	60.43	113.2	51.92	83.48	360.27	212.23	299.89	96.83	68.16	51.64	91.57	110.69	271.54	235.07	230.44	115.62	401.12	106.34	58.59	141.01	67.76	50.48	35.9	286.91	119.13	61.42	119.01	91.9	137.16	168.25	75.43
TYRO3	29.93	9.23	17.61	50.97	3.34	9.03	11.31	36.6	18.65	9.62	22.69	4.31	24.27	48.47	5.91	33.25	23.05	18.66	14.77	74.89	27.96	7.51	14.39	8.14	13.59	47.34	12.58	4.49	10.17	30.19	13.85	41.33	6.78	2.18	14.64	38.57	14.2	5.22	25.6	18.03	21.21	7.17	43.06	7.84	22.52	18.38	20.7	5.88	17.75
WEE1	4.08	2.64	1.76	2.37	1.11	4.1	3.08	4.13	4.91	3.21	2.84	1	1	4.85	1.97	1.96	8.78	1.33	1.34	3.48	3.99	1.67	2.5	1	1.7	3.23	3.15	2.25	3.39	7.55	4.16	7.75	2.26	4.36	4.39	4.17	3.55	1.31	1.51	5.41	1.63	1.2	1.44	3.92	1.61	3.06	2.59	3.53	1.27
WFDC2	6.8	18.45	7.04	3.56	3.34	5.75	11.31	1.77	1.96	1.07	3.78	14.37	1	4.85	17.72	1.96	1.1	1.33	2.69	1.74	3.99	1.67	3.75	2.33	1.7	1.08	1.05	2.25	13.57	2.52	13.85	23.25	6.78	6.54	1.46	11.47	8.88	57.45	1.51	1.8	1.63	2.39	4.31	3.92	4.82	3.06	2.59	1.18	5.07
WNT1	1.36	1.32	1.76	2.37	2.23	1	1.03	1	1	1.07	1	2.87	1	4.85	1.97	7.82	2.2	1.33	5.37	3.48	3.99	1.67	1.25	1	3.4	4.3	1.05	2.25	3.39	5.03	1.39	5.17	2.26	4.36	1.46	1.04	3.55	1.31	1.51	1.8	1.63	2.39	1.44	2.61	1.61	3.06	1.29	2.35	1
WNT10B	1.36	1.32	12.33	1.19	1.11	2.46	1.03	1	3.93	1.07	2.84	1.44	1.14	4.85	1.97	1.96	2.2	2.67	1.34	6.97	7.99	4.17	1.88	1	1	1.08	3.15	2.25	3.39	2.52	1.39	2.58	9.04	4.36	1.46	1.04	1.78	1.31	1.51	5.41	1.63	1.2	1.44	1.31	1.61	3.06	2.59	3.53	1
WT1	2.72	5.27	7.04	26.08	6.68	4.1	3.08	2.95	1.96	2.14	3.78	1	1	24.23	9.84	3.91	1.1	2.67	5.37	5.22	7.99	2.5	1	2.33	1	5.38	1.05	2.25	10.17	5.03	4.16	2.58	4.52	6.54	5.86	1.04	5.33	2.61	1.51	1.8	6.53	1.2	2.87	3.92	1.61	9.19	1.29	3.53	1.27
XPC	144.19	166.06	169.04	130.39	225.92	182.21	148.06	132.82	113.86	96.18	110.59	120.72	89.11	169.63	163.39	129.07	145.99	179.9	167.85	203.76	307.54	101.84	101.95	140.71	170.76	185.06	101.72	179.62	223.83	143.39	112.22	82.66	142.33	298.88	112.72	52.13	225.5	148.84	146.05	158.65	117.47	90.86	129.18	137.21	135.09	199.11	89.28	128.25	192.06
XRCC5	1070.57	1284.96	1551.26	1380.92	1804	1291.89	1333.56	1275.7	972.7	1429.83	958.45	528.16	812.64	1715.69	639.79	1151.89	1158.01	1416.52	962.77	1215.59	1521.75	1057.68	618.59	535.53	1175.76	1875.31	1237.36	1295.49	1790.65	1051.51	1536.42	1079.75	883.36	2430.28	901.78	1061.31	1702.76	604.51	1331.03	1234.98	923.48	1077.12	1485.52	666.47	995.5	980.22	1455.66	1371.87	1401.49
YES1	148.27	162.1	169.04	199.14	221.47	190.42	169.65	123.97	92.26	225.48	103.97	86.23	140.69	329.57	173.24	132.99	72.44	157.24	87.28	155	295.56	217.88	120.09	89.55	389.94	135.56	173.02	132.47	237.4	155.97	185.64	216.98	58.74	268.33	244.48	167.85	225.5	147.54	240.91	153.25	146.84	105.2	153.58	124.15	165.65	223.61	188.91	467.1	229.46
YY1	121.07	127.84	206.01	150.54	183.63	194.52	134.69	165.29	196.31	156.02	104.92	173.18	94.04	242.33	141.74	119.3	107.57	159.91	128.91	221.17	219.67	151.1	88.82	132.57	163.96	245.31	169.87	123.49	200.09	178.61	182.87	154.99	140.07	231.25	137.61	177.23	218.39	181.48	185.2	153.25	122.37	95.64	146.4	120.23	180.12	113.34	157.86	715.35	245.94
NEG_A	4	1	2	1	3	5	3	3	3	2	1	1	1	2	4	2	2	3	5	2	3	9	2	4	2	1	1	5	1	1	1	1	1	1	1	4	1	1	1	4	3	1	2	1	1	3	1	4	6
NEG_B	1	1	1	3	1	1	5	2	1	3	3	4	3	2	2	2	1	2	3	2	1	1	3	1	1	1	2	1	1	1	1	1	1	3	1	3	1	3	2	1	1	4	1	3	2	1	1	3	5
NEG_C	1	1	3	4	3	3	3	3	2	3	1	3	3	1	3	1	1	1	4	1	2	2	2	5	1	1	4	1	1	1	3	1	4	1	3	2	1	1	1	3	1	2	1	2	1	1	1	3	4
NEG_D	2	1	2	1	1	3	1	4	1	2	1	1	4	3	1	1	3	1	2	2	1	2	1	1	2	4	2	1	1	1	2	1	4	2	3	3	1	1	1	1	4	1	2	2	1	2	2	3	8
NEG_E	4	3	3	5	1	5	3	2	6	3	5	2	1	4	4	3	1	2	3	1	1	2	1	1	3	2	2	5	2	1	5	3	1	2	2	2	4	2	3	3	2	2	3	2	4	1	2	7	7
NEG_F	6	4	1	2	3	5	1	4	3	3	5	4	7	5	7	6	6	2	3	2	4	6	5	4	2	7	4	1	2	2	2	2	5	2	2	2	4	2	2	4	5	7	4	2	3	3	3	7	7
NEG_G	2	1	1	1	1	3	1	2	1	1	3	2	1	1	1	1	2	1	1	1	1	4	2	1	1	2	3	1	1	1	1	3	1	1	1	1	2	1	4	1	1	1	1	1	1	1	3	1	2
NEG_H	1	2	2	1	2	2	1	1	2	2	1	1	2	2	1	1	1	2	3	2	3	6	1	1	1	1	1	1	1	1	1	2	2	1	1	1	2	3	1	1	2	3	2	1	2	1	3	4	2
POS_A	5237	5846	5246	5088	5978	6802	6220	7427	5144	5497	6399	5938	7031	7938	7171	5829	7934	6558	6435	6399	6069	7562	6423	6158	6555	7506	6293	4386	3426	5791	4756	4910	4362	5572	3508	5851	5298	4174	4652	4143	4724	4745	5274	4672	4340	3501	4042	13433	14395
POS_B	2167	2458	2177	2111	2220	2497	2294	2653	1920	2255	2416	2225	2622	3011	2675	2048	2802	2321	2295	2330	2224	2665	2474	2256	2363	2633	2234	1589	1262	2214	1699	1704	1585	2039	1305	2124	2066	1590	1816	1618	1943	1895	1976	1755	1573	1353	1520	4830	5072
POS_C	553	588	587	493	580	605	577	686	474	555	607	579	716	823	716	599	777	564	617	657	614	687	670	616	628	717	605	457	350	563	446	530	423	581	350	569	511	444	468	431	518	519	582	443	438	379	428	1257	1292
POS_D	114	140	143	118	155	168	159	187	125	139	152	141	178	179	171	148	177	148	153	175	148	187	167	167	151	177	149	107	72	133	106	124	110	127	82	144	152	145	157	87	119	144	128	121	119	91	102	324	324
POS_E	14	17	21	24	19	27	23	24	13	22	21	29	33	24	29	19	20	22	24	22	26	25	26	24	25	21	25	15	13	23	14	18	23	16	11	26	13	24	18	10	16	17	23	9	17	16	21	39	58
POS_F	7	7	7	8	15	8	10	18	13	9	14	15	16	14	20	9	17	13	12	8	6	11	16	11	10	10	15	12	4	9	10	8	12	8	12	14	8	6	7	7	8	10	11	13	4	3	8	29	24
[truncated: 10 more columns]
